# Supplementary material for: Electrochemical vicinal aminotrifluoromethylation of alkenes: high regioselective acquisition of β-trifluoromethylamines
Source: Royal Society of Chemistry journal article supplement (doi:10.1039/c9ob00717b), 2019-01-01
Supplement: c9ob00717b1.pdf [file c9ob00717b1.pdf]

# Supporting Information

## Electrochemical Vicinal Aminotrifluoromethylation of Alkenes: High Regioselective Acquisition of $\beta$ -Trifluoromethylamines

*Yubing Huang\**, Huanliang Hong, Zirong Zou, Chunshu Liao, Jingjun Lu, Yongwei

*Qin, Yibiao Li, and Lu Chen*

*School of Biotechnology and Health Sciences, Wuyi University, Jiangmen, 529020*

*(China).*

*E-mail: [wyuchemhyb@126.com](mailto:wyuchemhyb@126.com)*

### Contents

|                                             |     |
|---------------------------------------------|-----|
| 1. NMR Spectra for All Compounds.....       | S2  |
| 2. X-ray Crystallographic Data.....         | S18 |
| 3. Other Alkenes and Nitriles Examined..... | S22 |

# 1. NMR Spectra for All Compounds

## <sup>1</sup>H NMR (500 MHz, CDCl<sub>3</sub>) spectrum of compound 3a

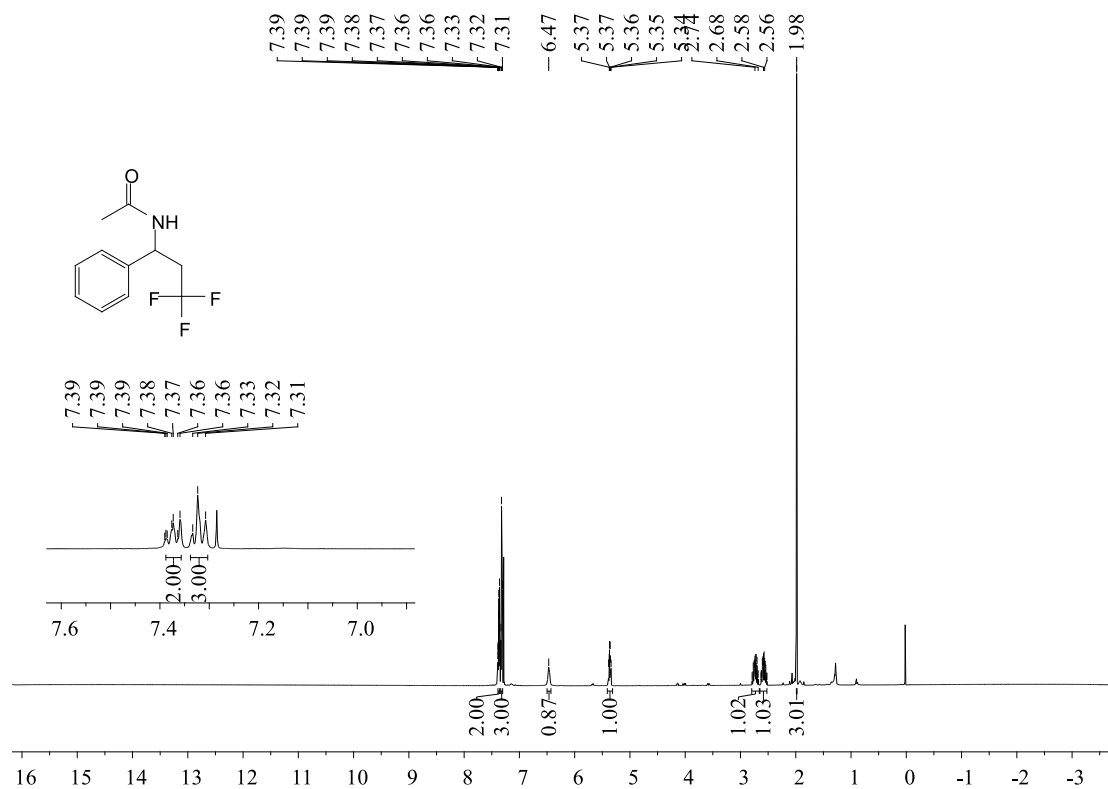

## <sup>13</sup>C NMR (126 MHz, CDCl<sub>3</sub>) spectrum of compound 3a

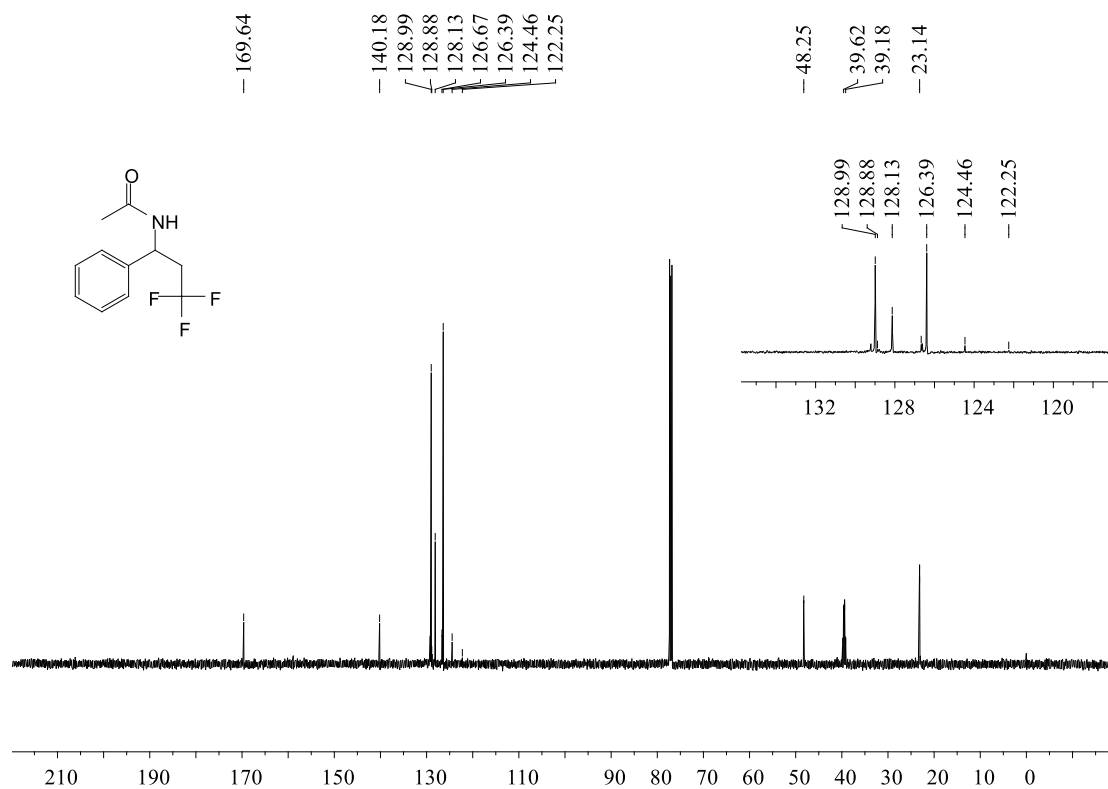

**<sup>19</sup>F NMR (471 MHz, CDCl<sub>3</sub>) spectrum of compound 3a**

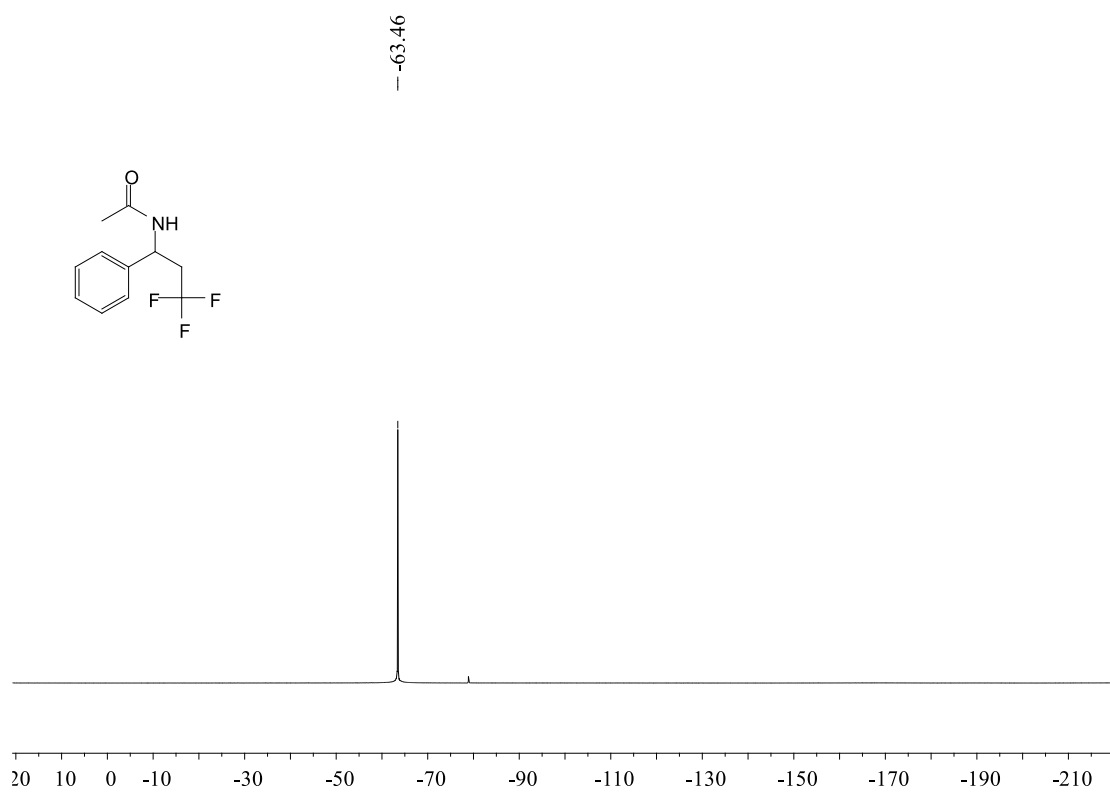

**<sup>1</sup>H NMR (500 MHz, CDCl<sub>3</sub>) spectrum of compound 3b**

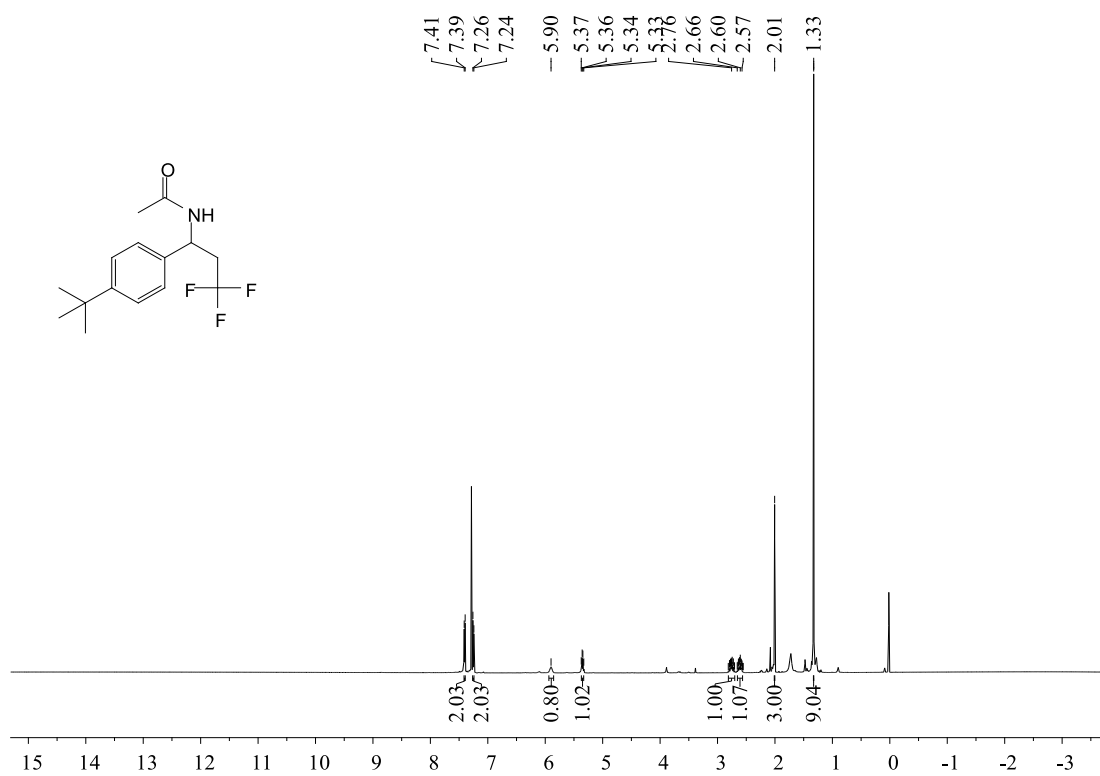

**<sup>13</sup>C NMR (126 MHz, CDCl<sub>3</sub>) spectrum of compound 3b**

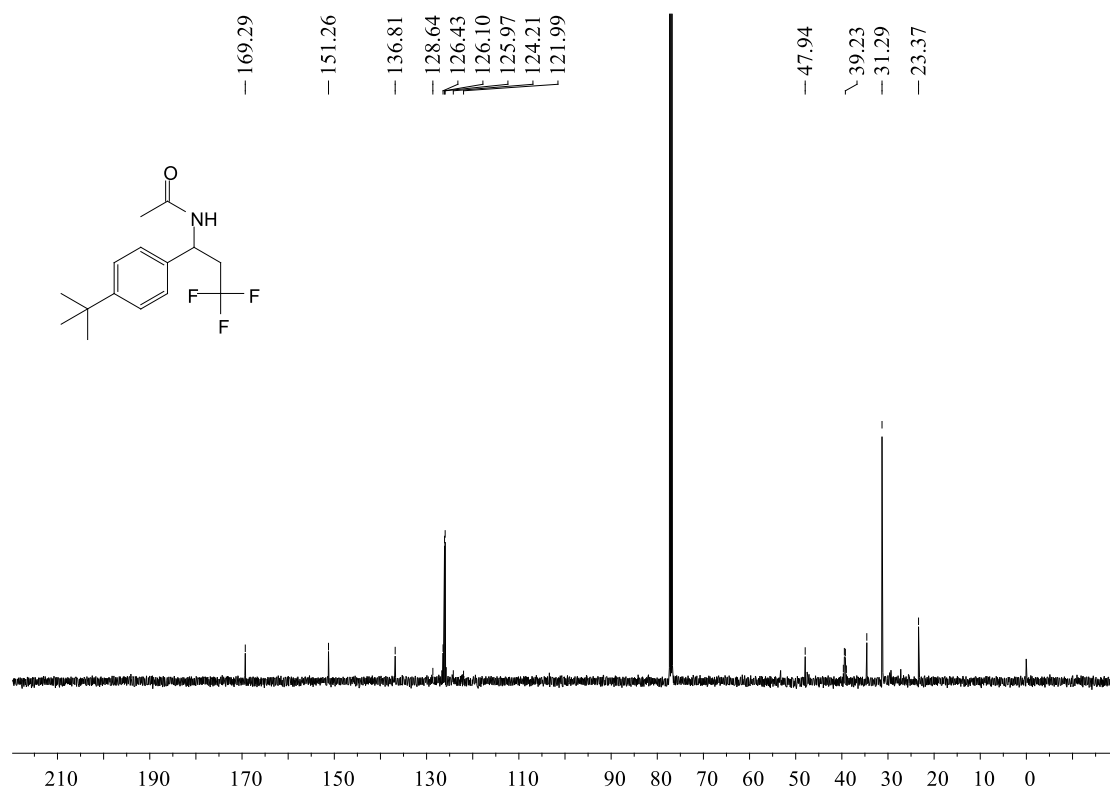

**<sup>19</sup>F NMR (471 MHz, CDCl<sub>3</sub>) spectrum of compound 3b**

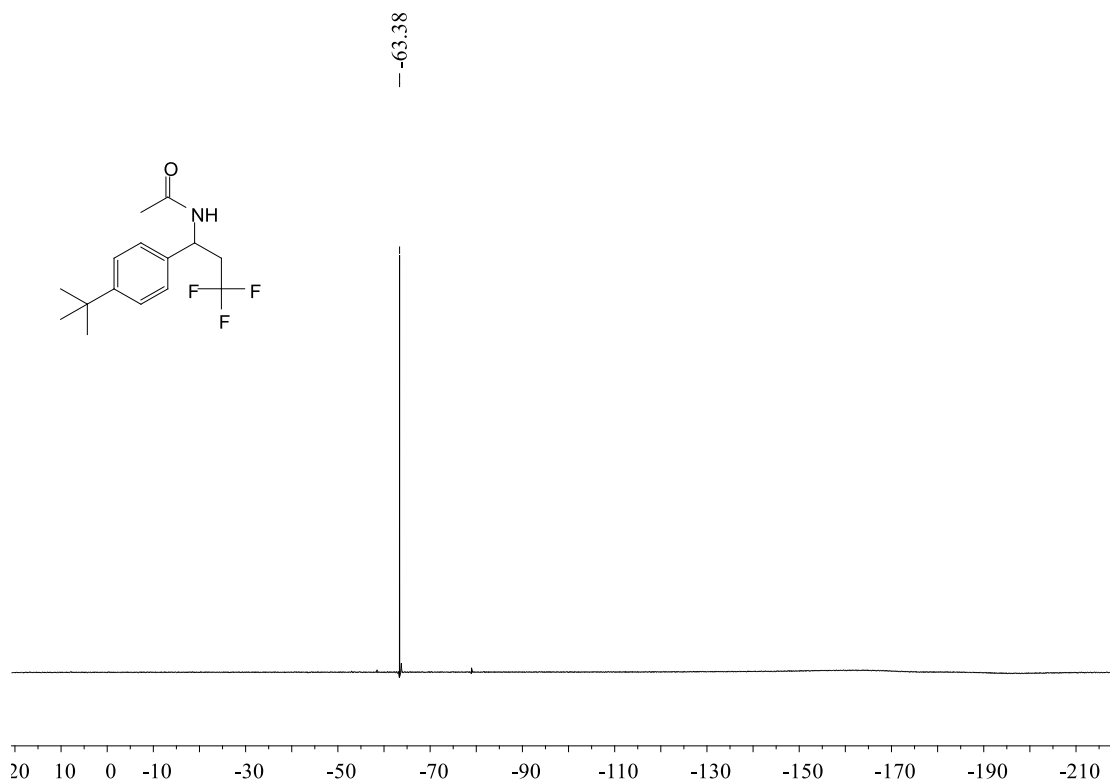

**<sup>1</sup>H NMR (500 MHz, CDCl<sub>3</sub>) spectrum of compound 3c**

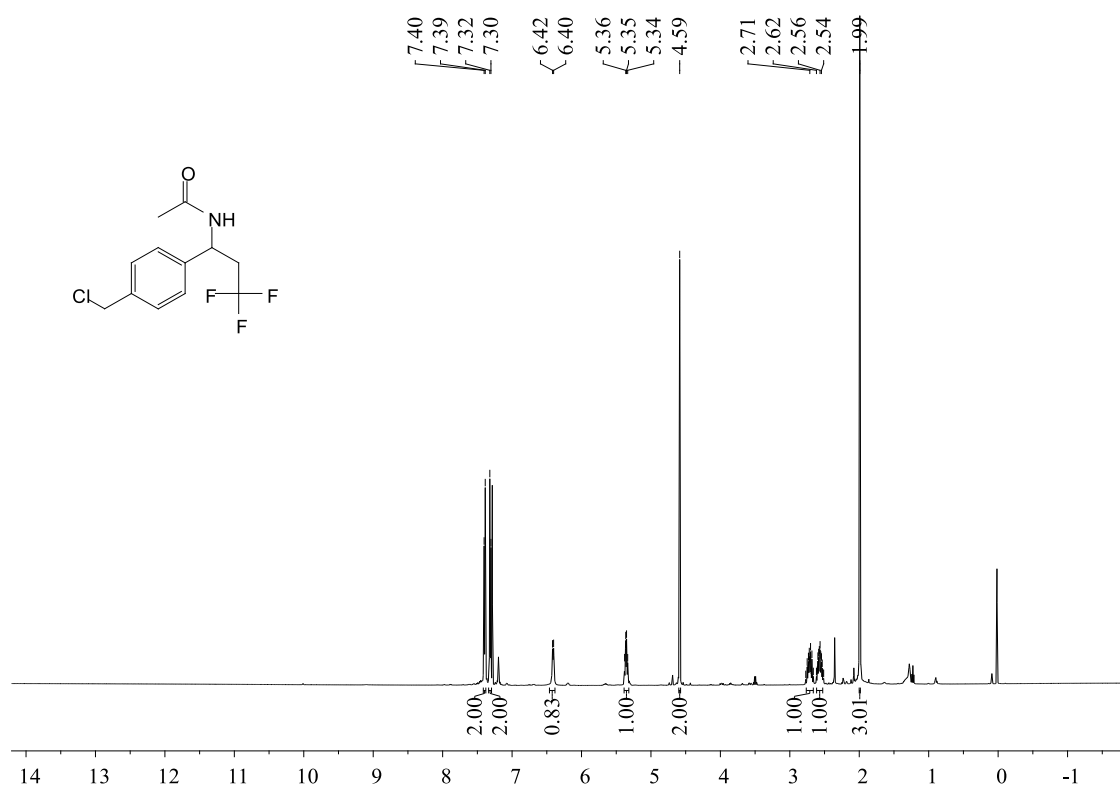

**<sup>13</sup>C NMR (126 MHz, CDCl<sub>3</sub>) spectrum of compound 3c**

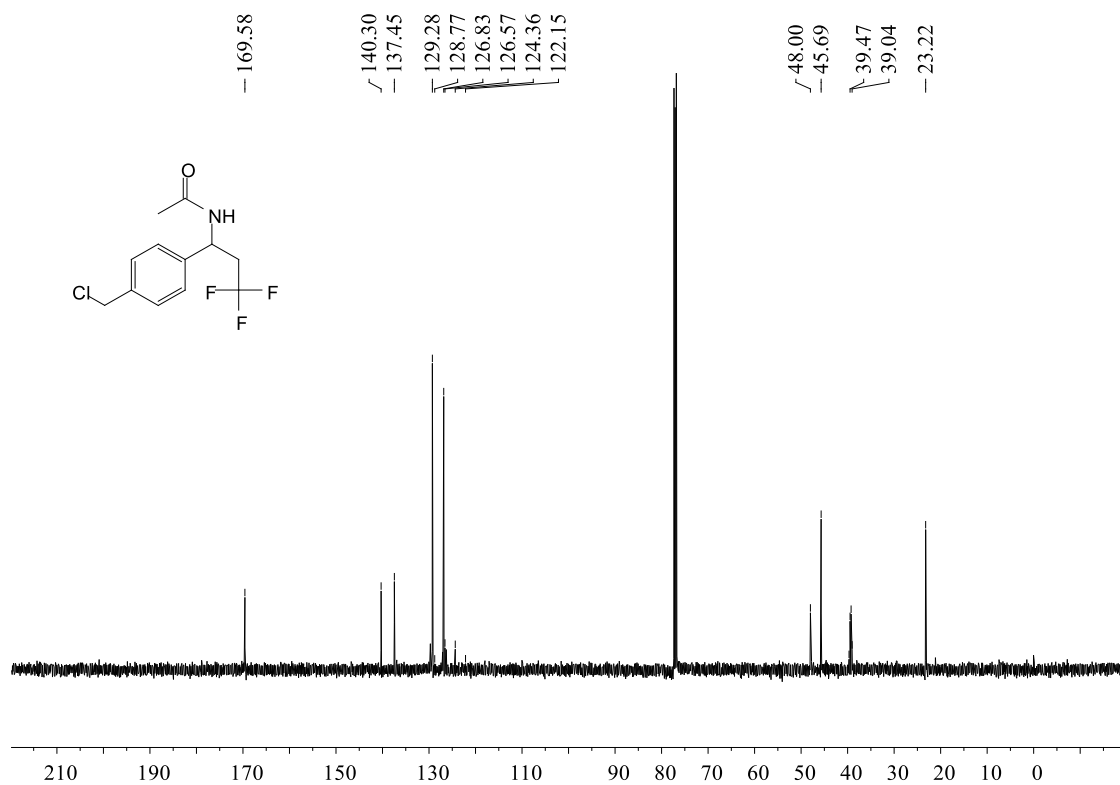

**<sup>19</sup>F NMR (471 MHz, CDCl<sub>3</sub>) spectrum of compound 3c**

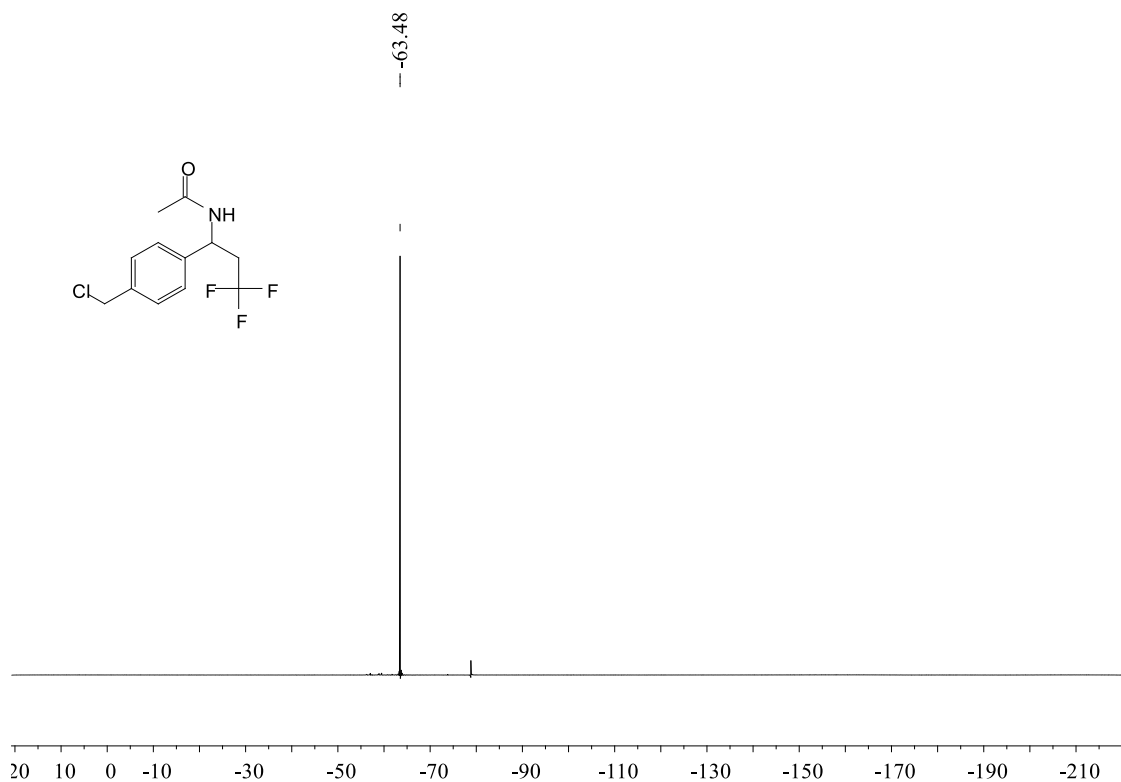

**<sup>1</sup>H NMR (500 MHz, CDCl<sub>3</sub>) spectrum of compound 3d**

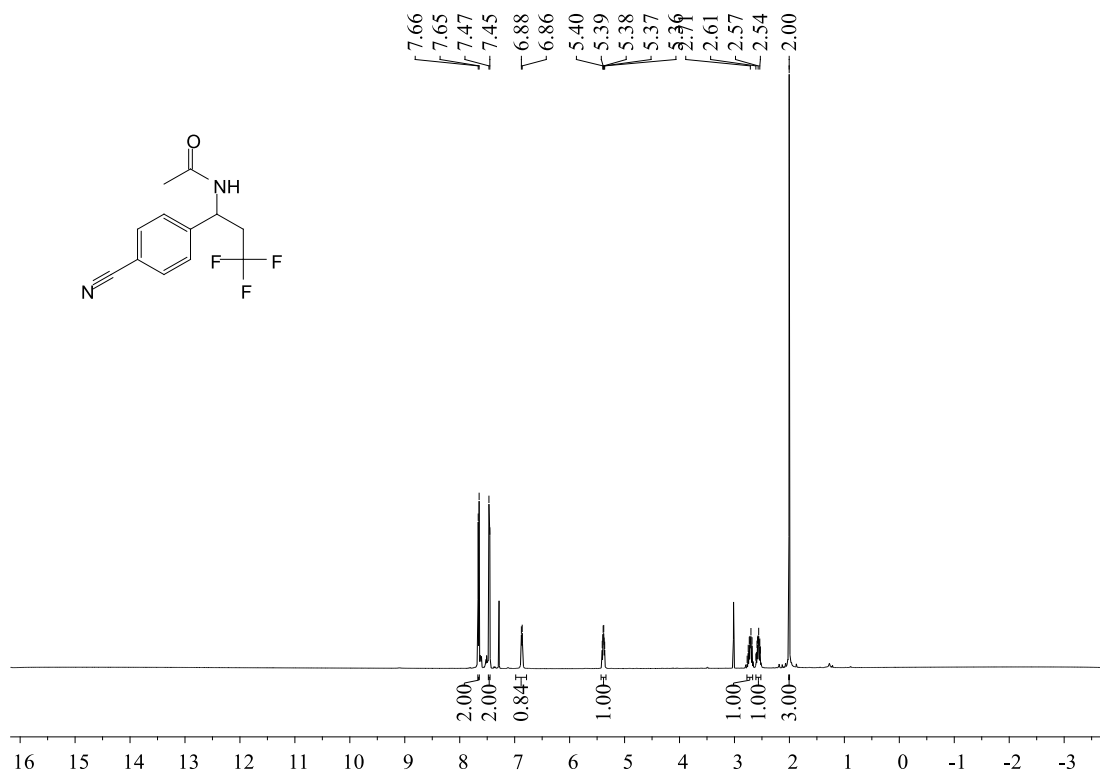

**<sup>13</sup>C NMR (126 MHz, CDCl<sub>3</sub>) spectrum of compound 3d**

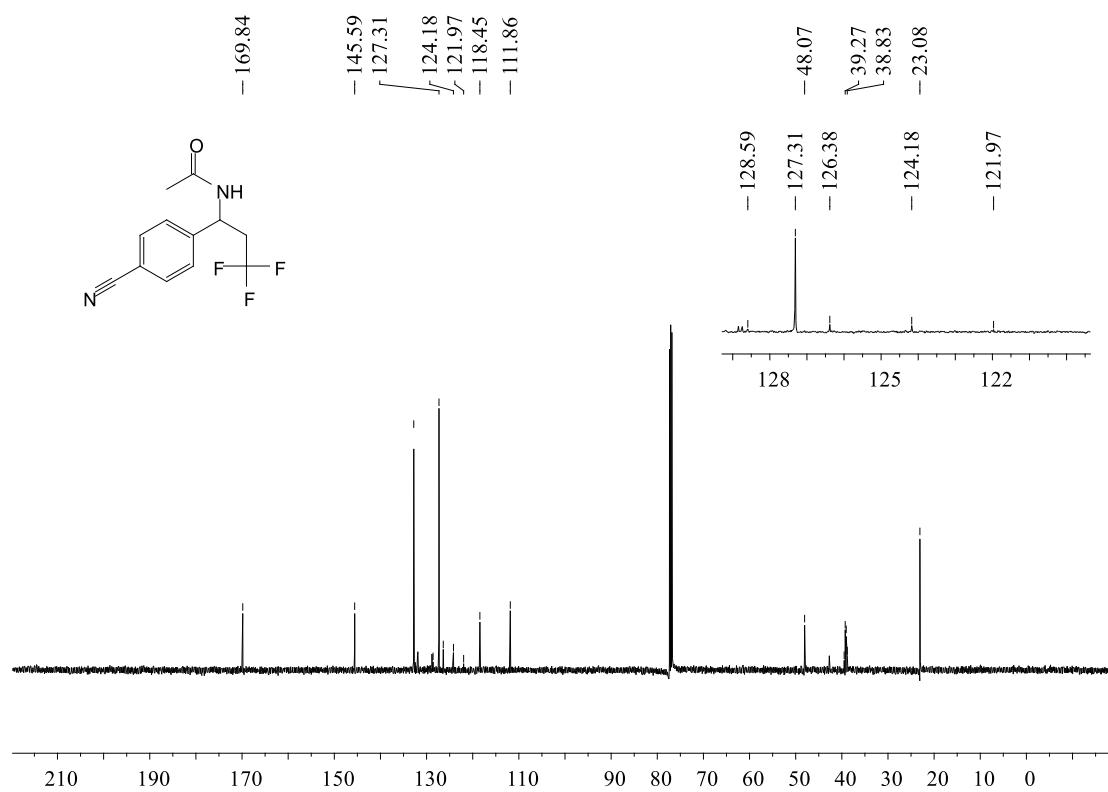

**<sup>19</sup>F NMR (471 MHz, CDCl<sub>3</sub>) spectrum of compound 3d**

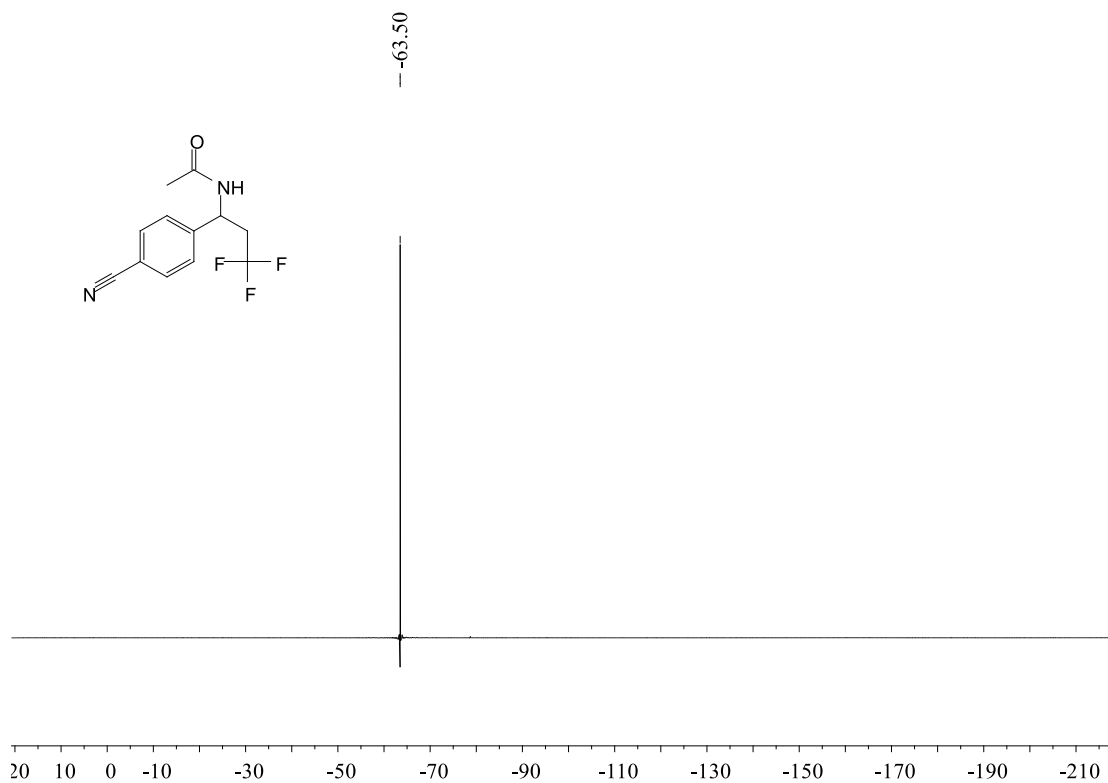

**<sup>1</sup>H NMR (500 MHz, CDCl<sub>3</sub>) spectrum of compound 3e**

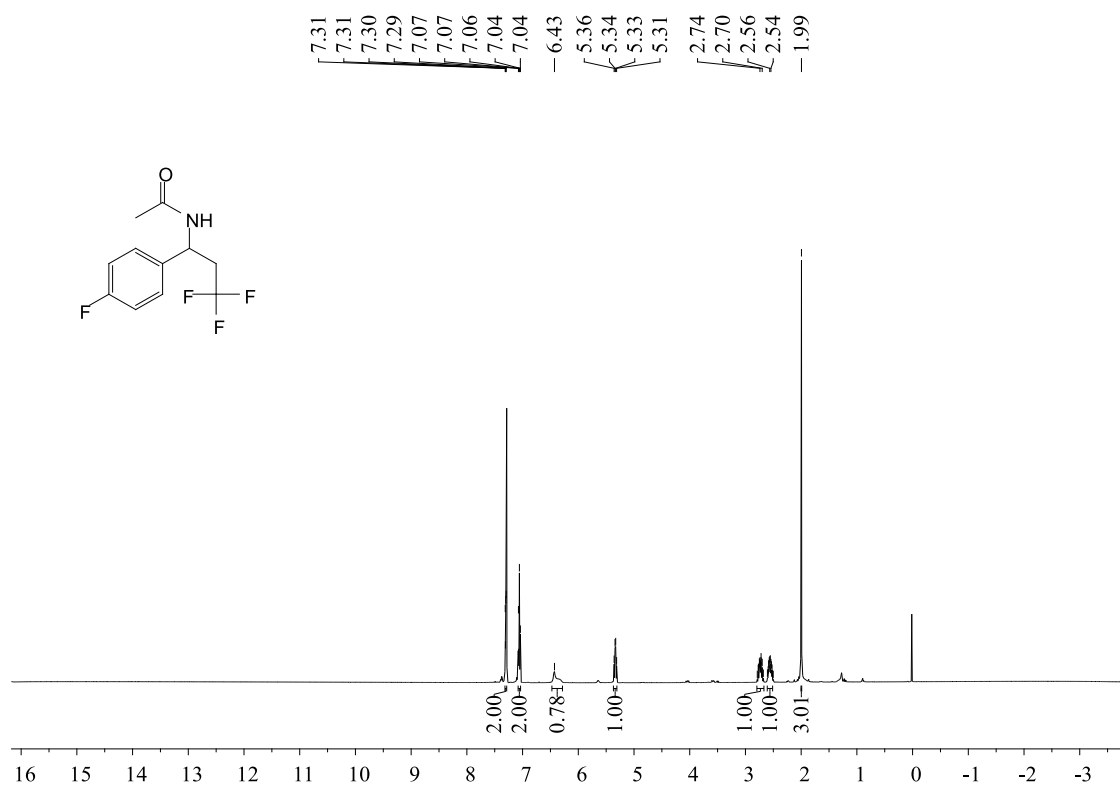

**<sup>13</sup>C NMR (126 MHz, CDCl<sub>3</sub>) spectrum of compound 3e**

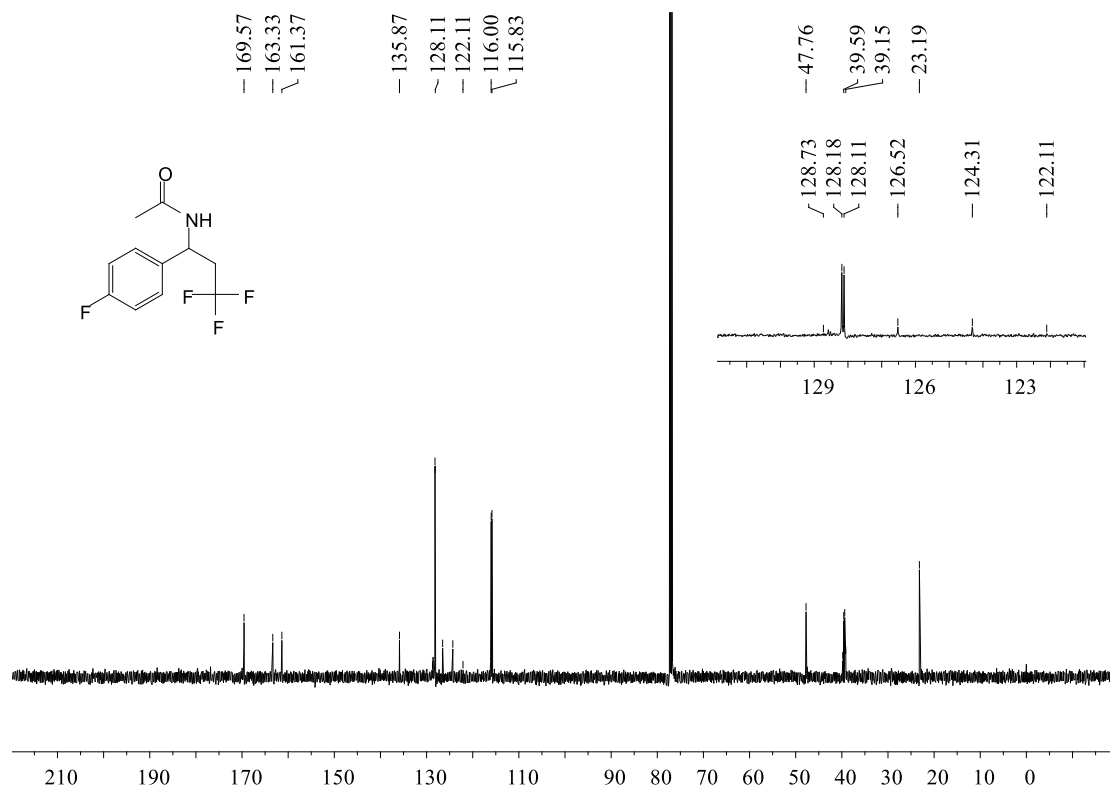



**<sup>19</sup>F NMR (471 MHz, CDCl<sub>3</sub>) spectrum of compound 3e**

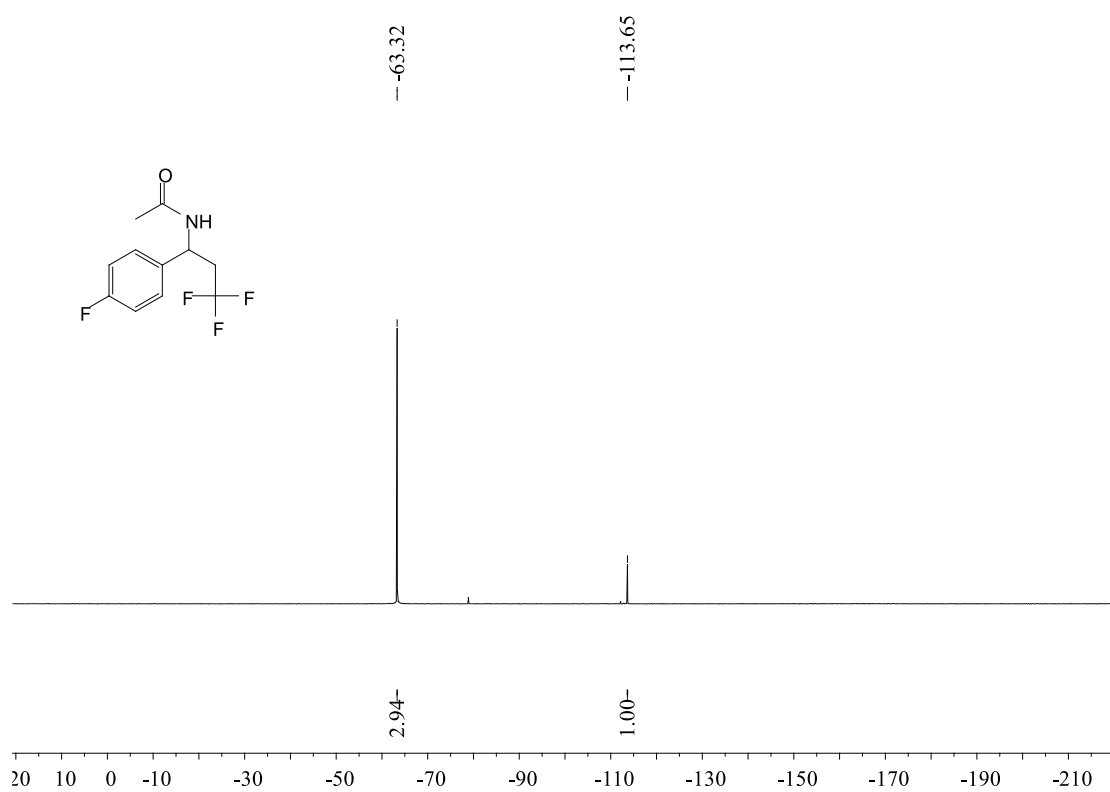

**<sup>1</sup>H NMR (500 MHz, CDCl<sub>3</sub>) spectrum of compound 3f**

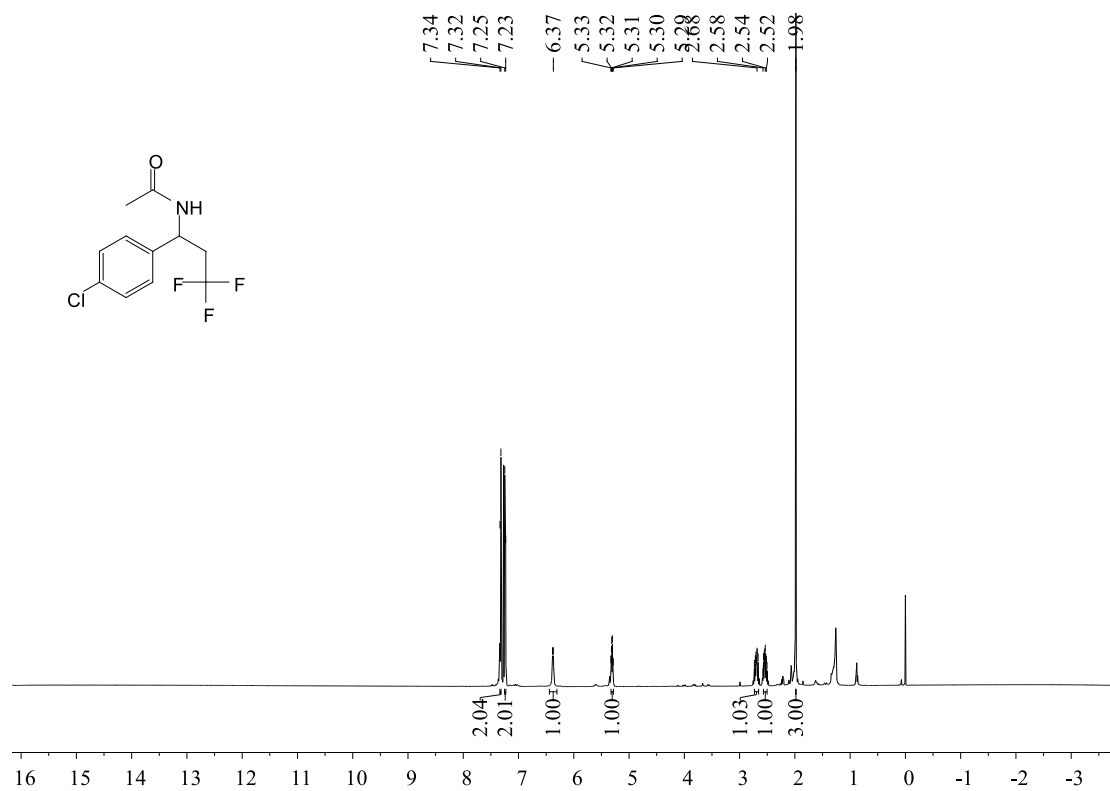

**<sup>13</sup>C NMR (126 MHz, CDCl<sub>3</sub>) spectrum of compound 3f**

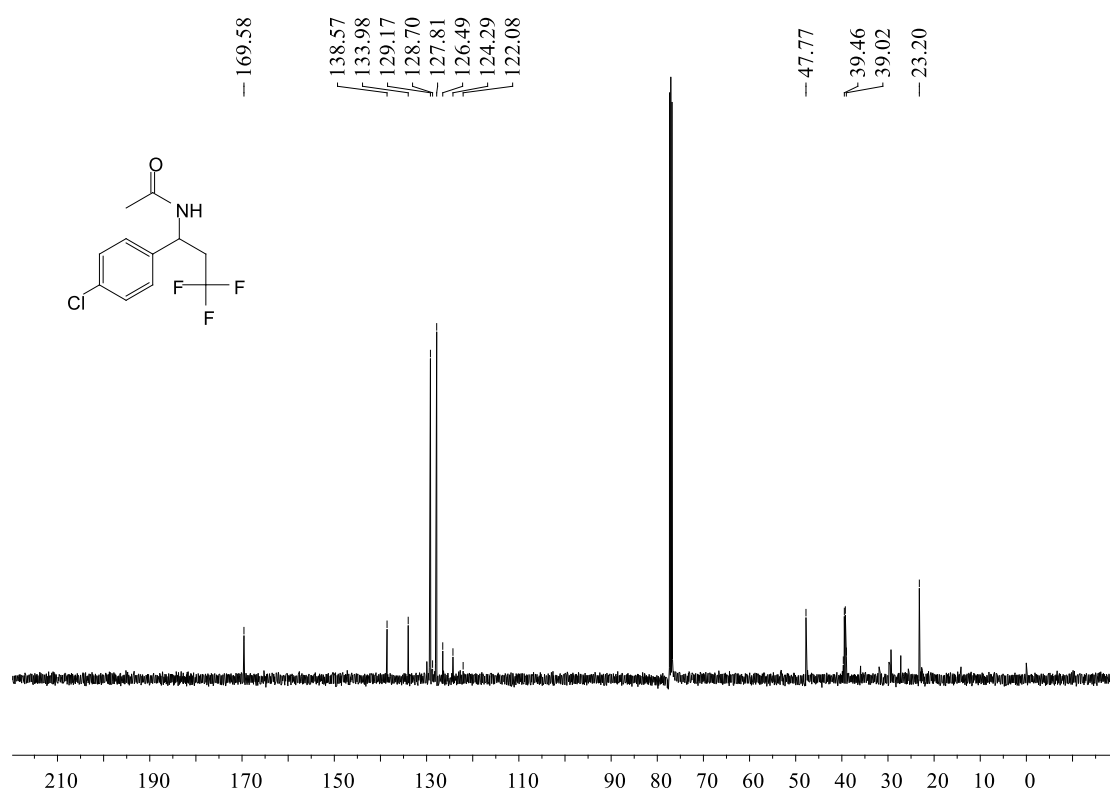

**<sup>19</sup>F NMR (471 MHz, CDCl<sub>3</sub>) spectrum of compound 3f**

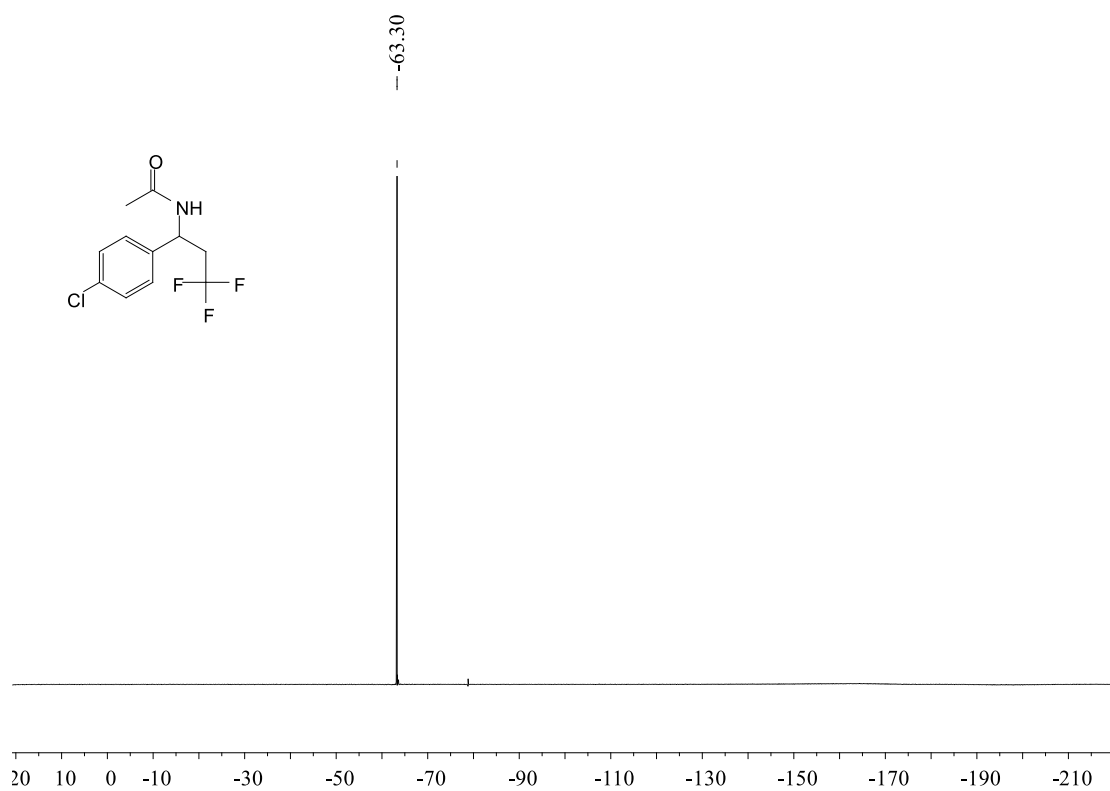

**<sup>1</sup>H NMR (500 MHz, CDCl<sub>3</sub>) spectrum of compound 3g**

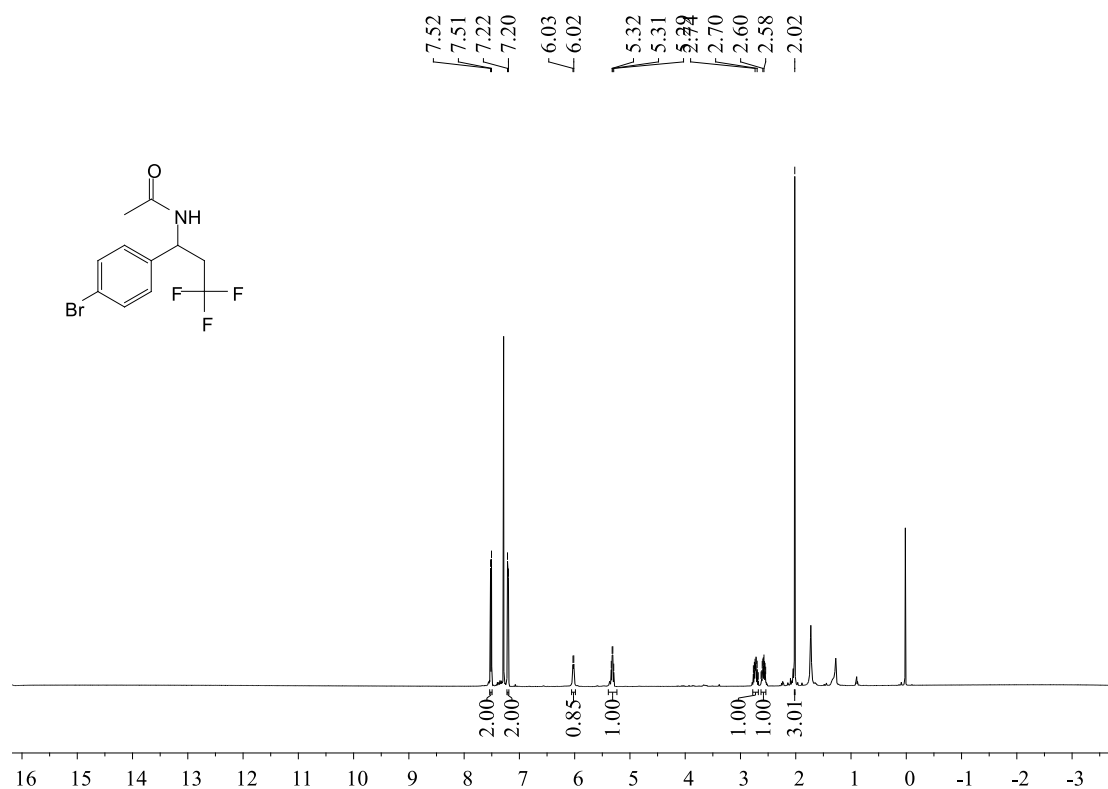

**<sup>13</sup>C NMR (126 MHz, CDCl<sub>3</sub>) spectrum of compound 3g**

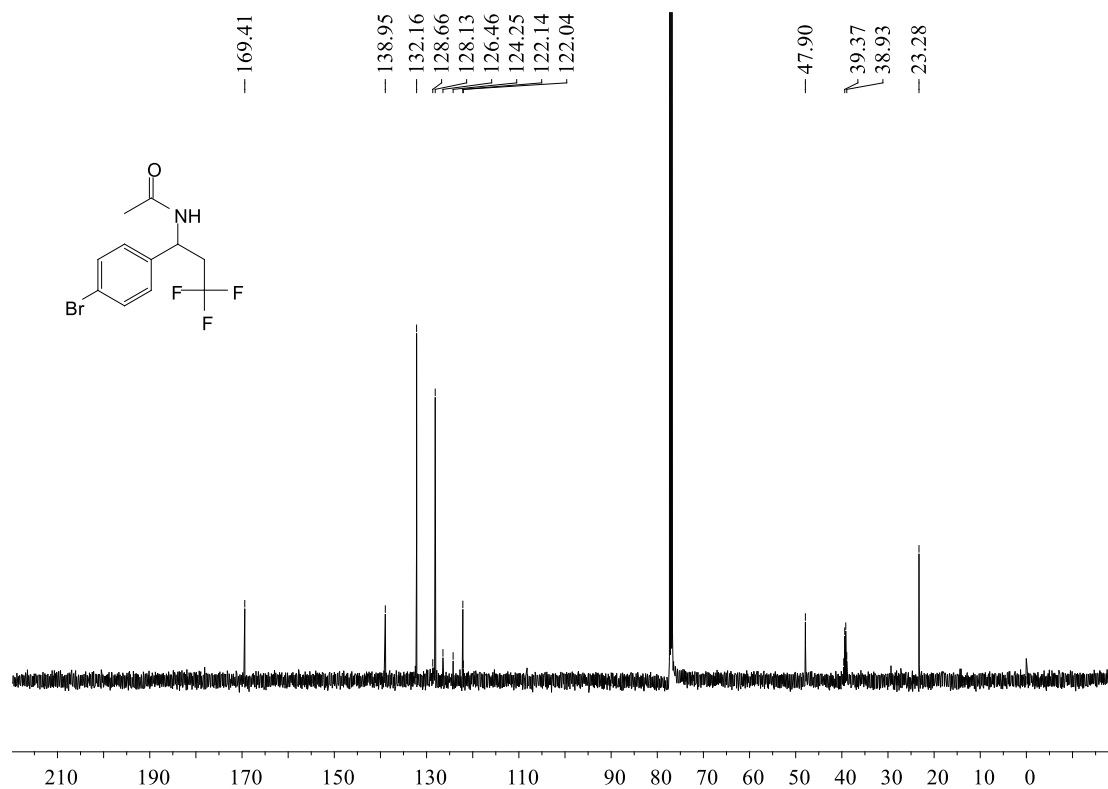

**<sup>19</sup>F NMR (471 MHz, CDCl<sub>3</sub>) spectrum of compound 3g**

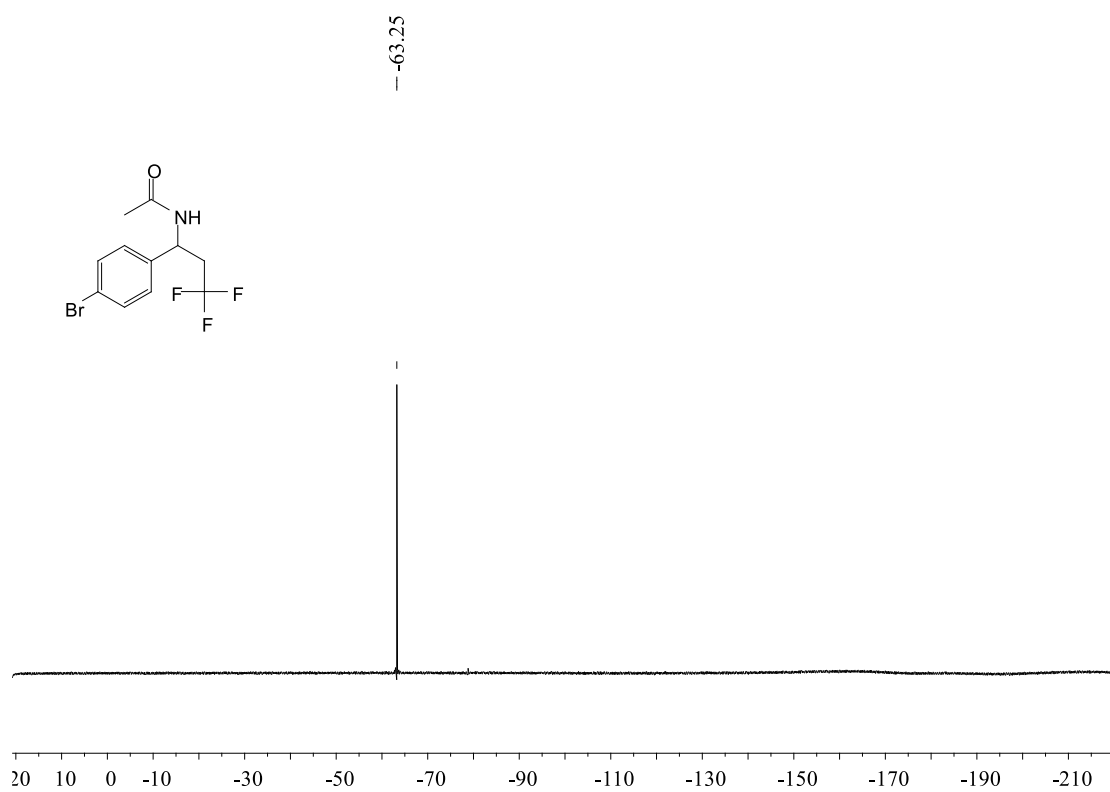

**<sup>1</sup>H NMR (500 MHz, CDCl<sub>3</sub>) spectrum of compound 3h**

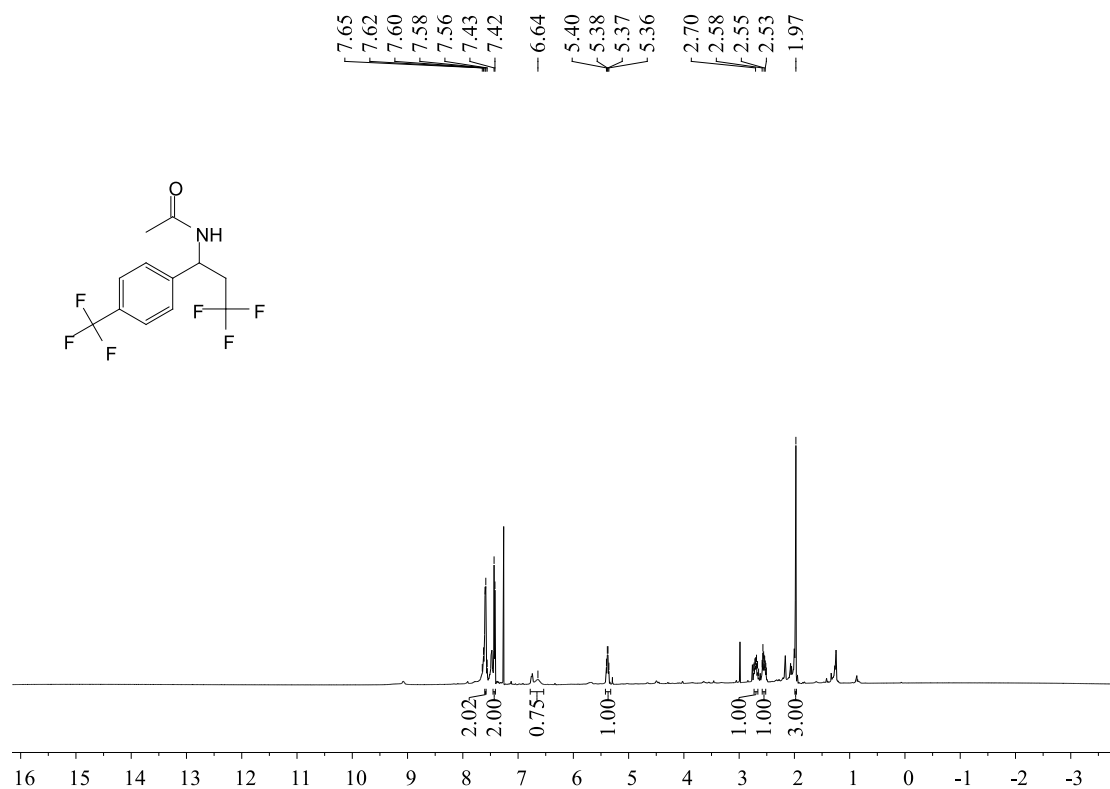

**<sup>13</sup>C NMR (126 MHz, CDCl<sub>3</sub>) spectrum of compound 3h**

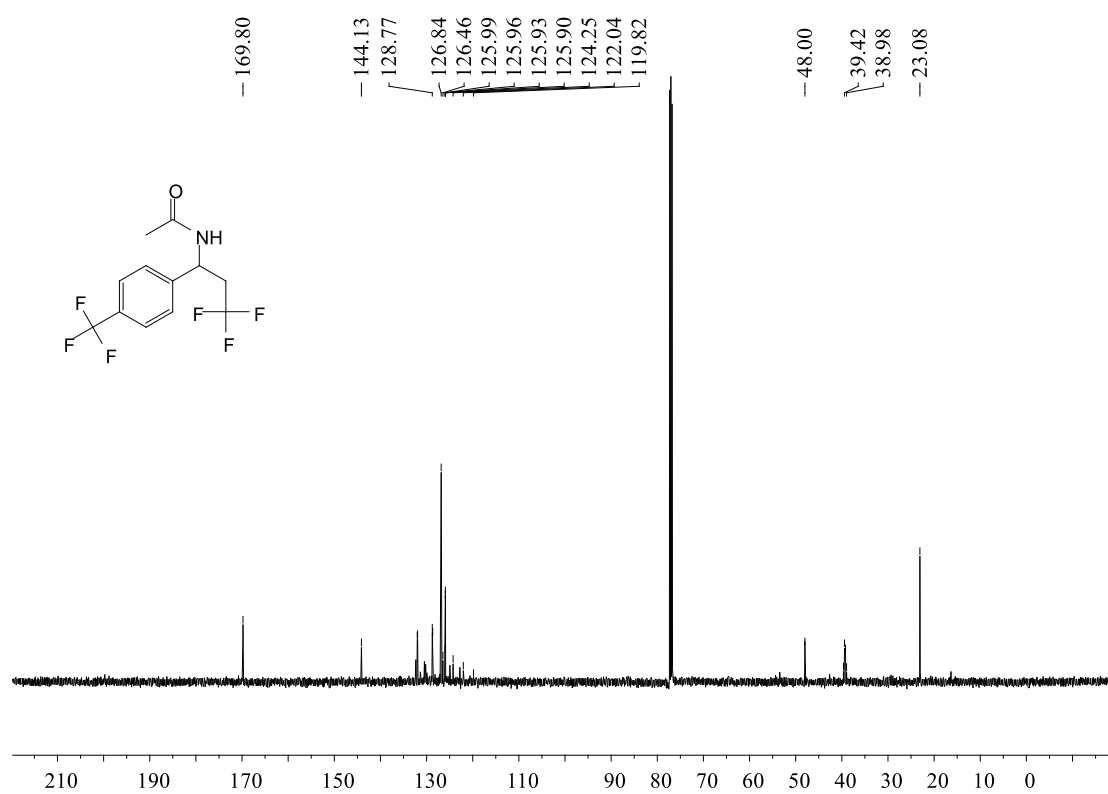

**<sup>19</sup>F NMR (471 MHz, CDCl<sub>3</sub>) spectrum of compound 3h**

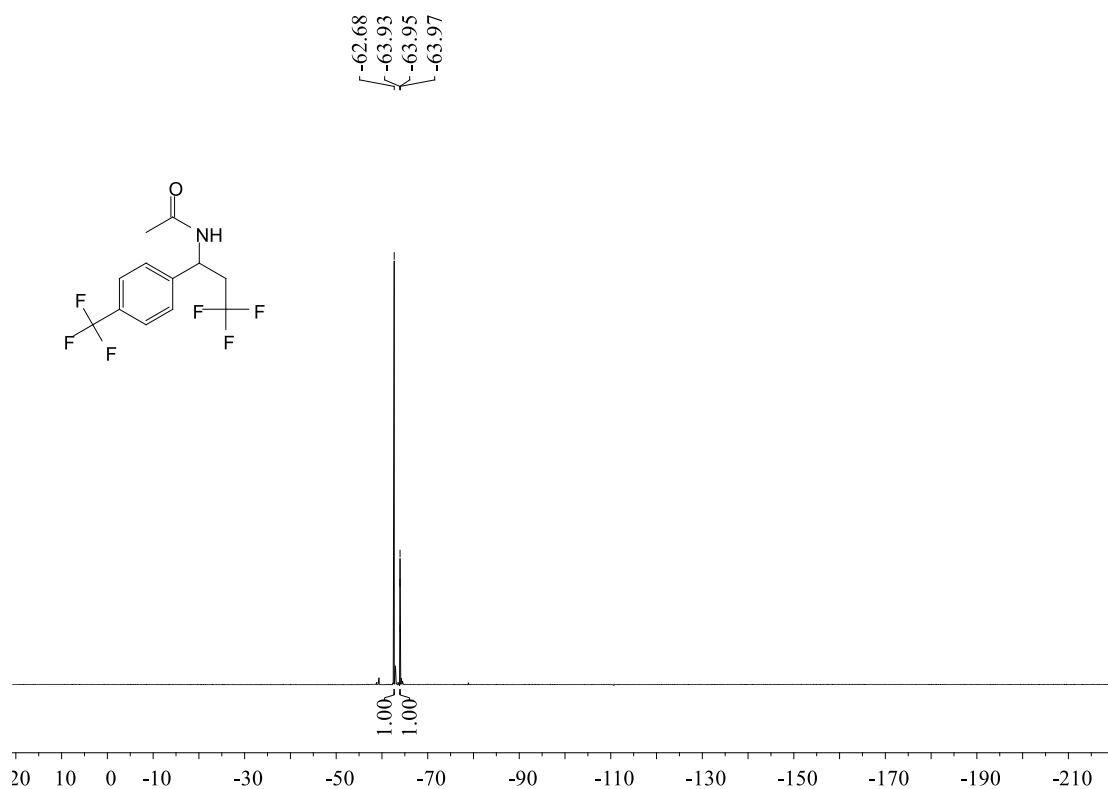

**<sup>1</sup>H NMR (500 MHz, CDCl<sub>3</sub>) spectrum of compound 3i**

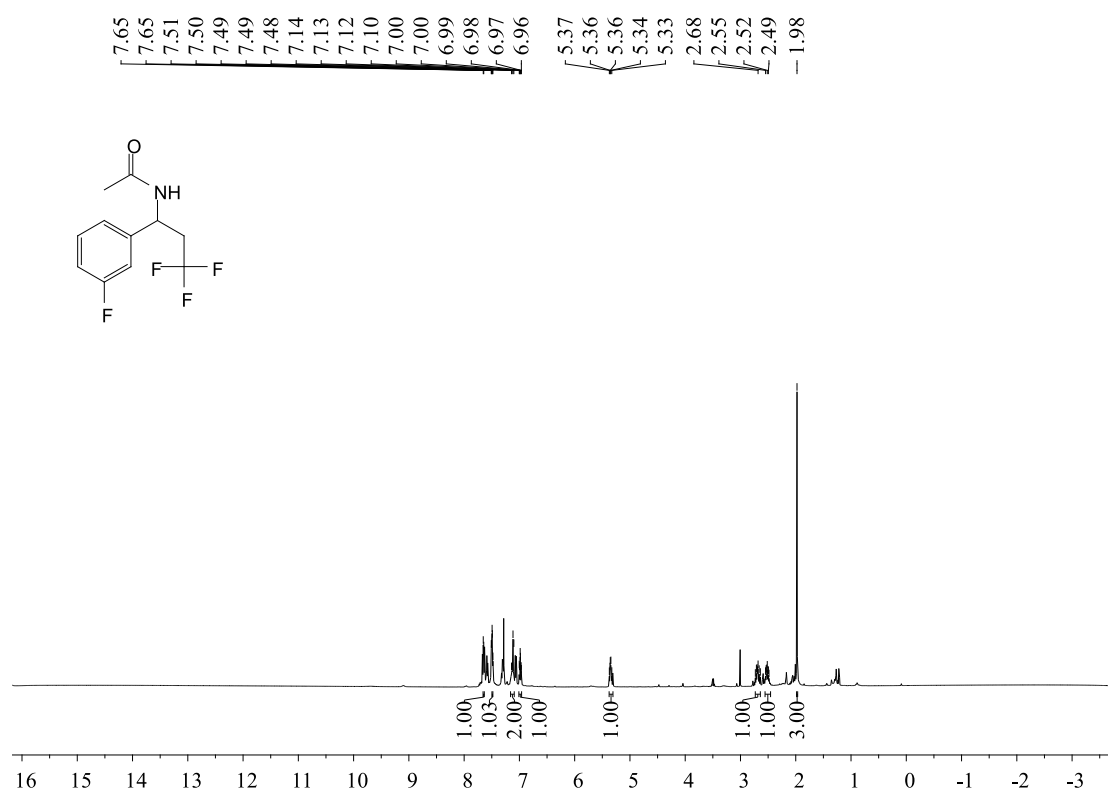

**<sup>13</sup>C NMR (126 MHz, CDCl<sub>3</sub>) spectrum of compound 3i**

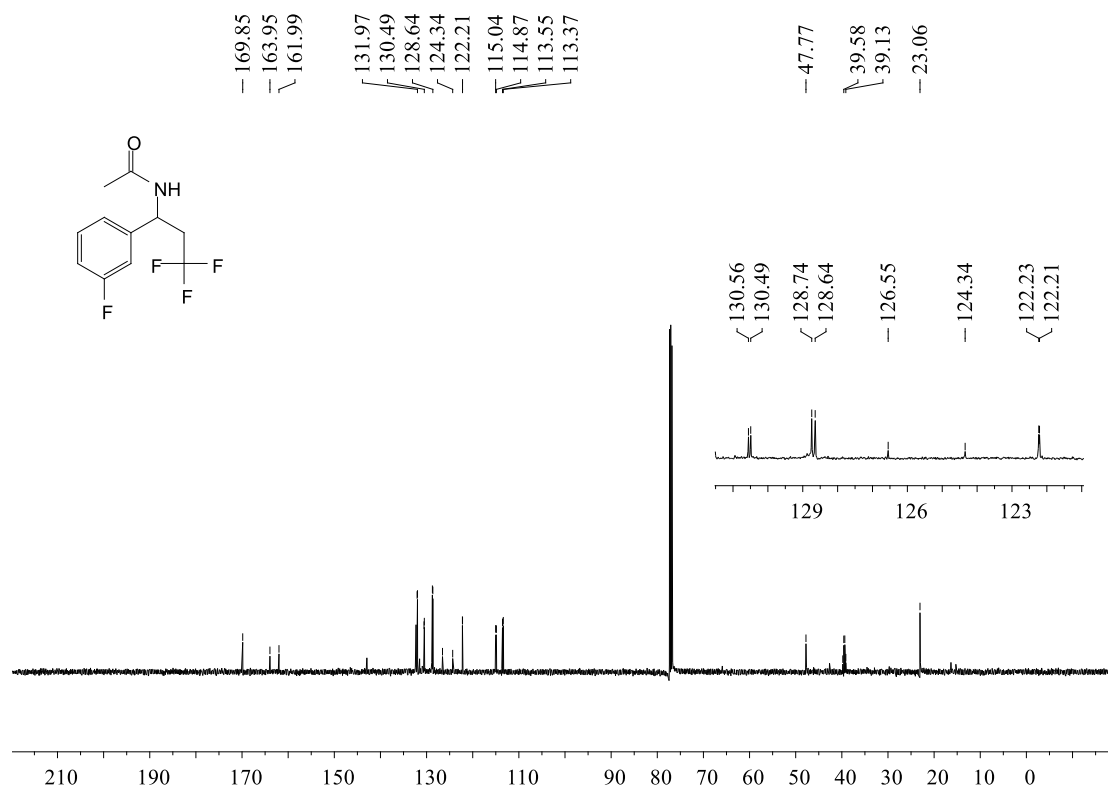

**<sup>19</sup>F NMR (471 MHz, CDCl<sub>3</sub>) spectrum of compound 3i**

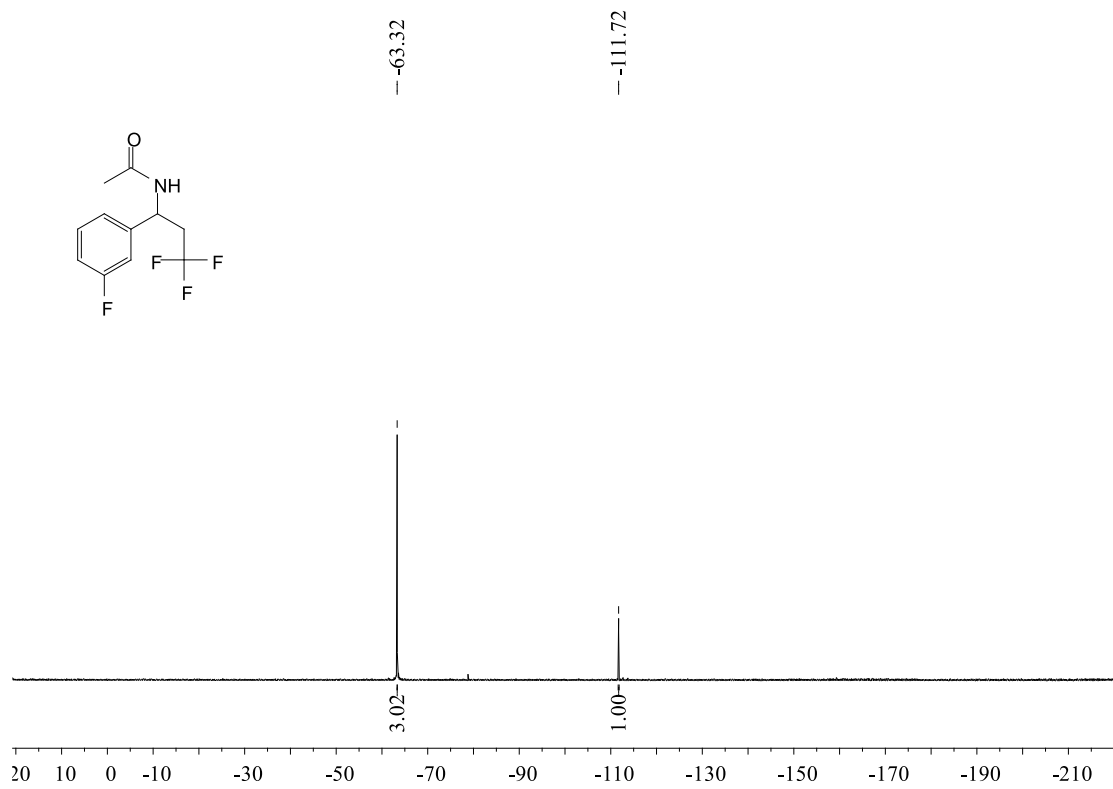

**<sup>1</sup>H NMR (500 MHz, CDCl<sub>3</sub>) spectrum of compound 3j**

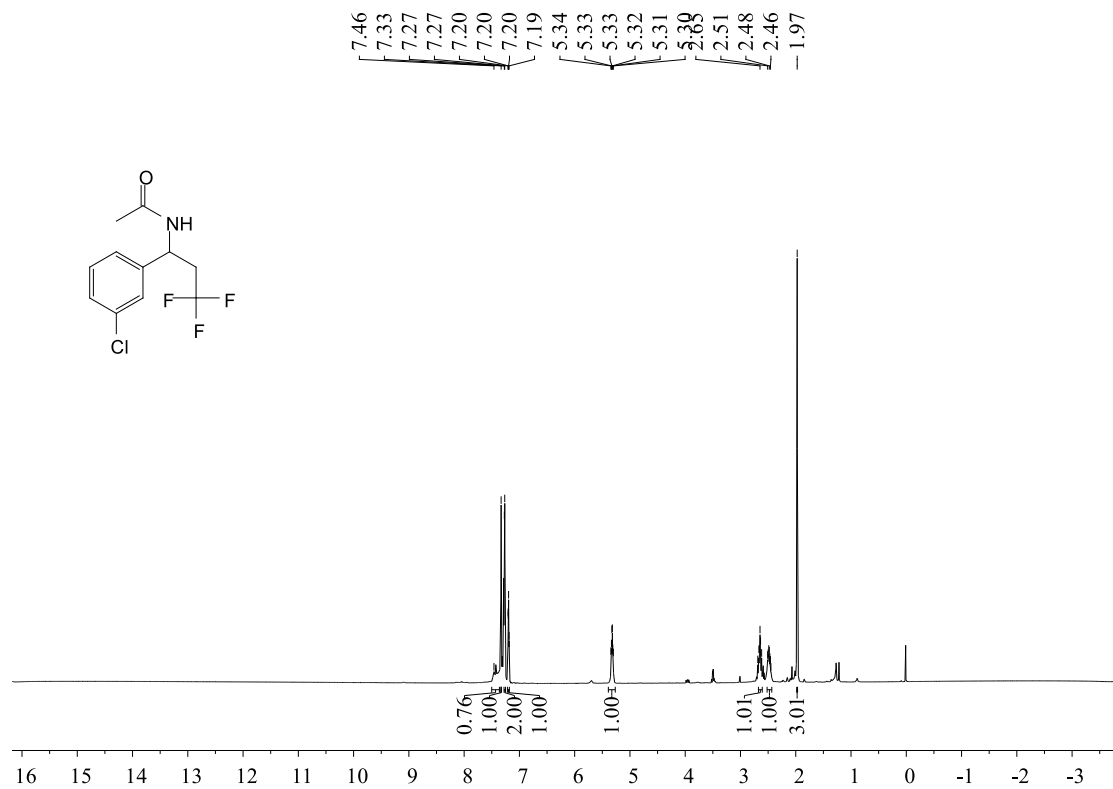

**<sup>13</sup>C NMR (126 MHz, CDCl<sub>3</sub>) spectrum of compound 3j**

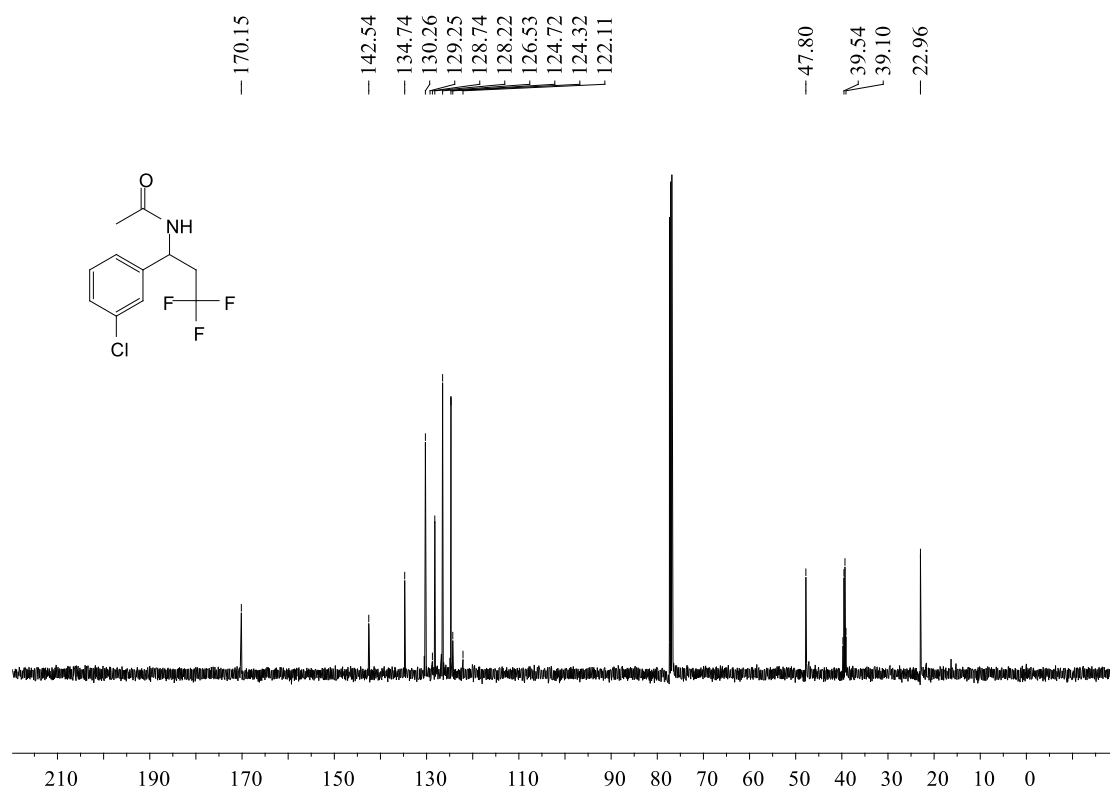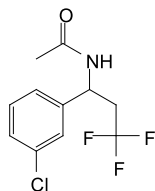

**<sup>19</sup>F NMR (471 MHz, CDCl<sub>3</sub>) spectrum of compound 3j**

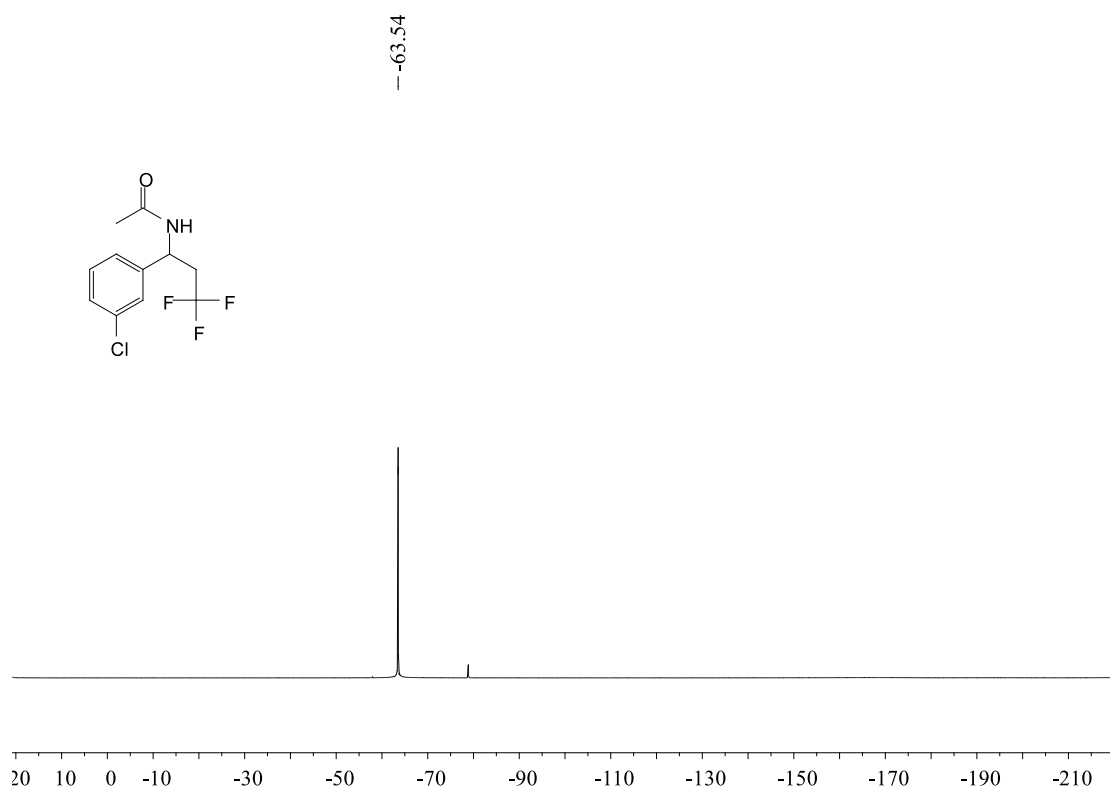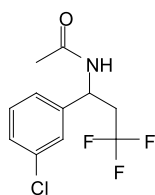



**<sup>1</sup>H NMR (500 MHz, CDCl<sub>3</sub>) spectrum of compound 3k**

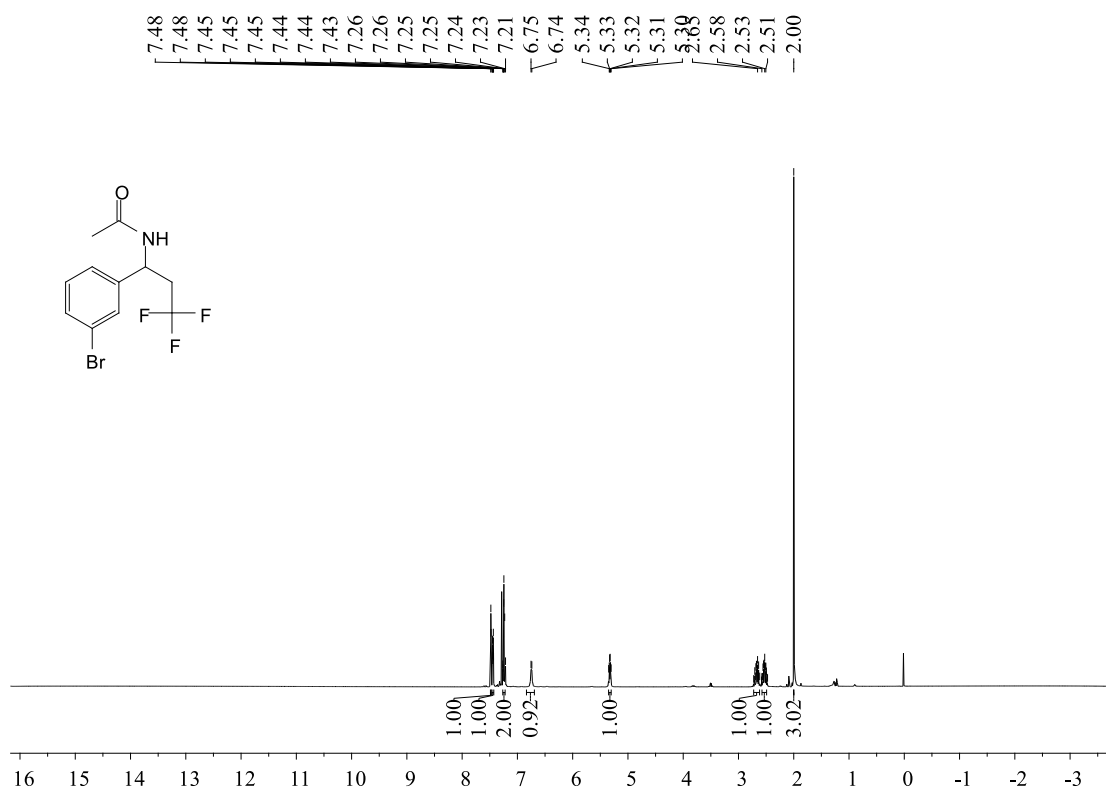

**<sup>13</sup>C NMR (126 MHz, CDCl<sub>3</sub>) spectrum of compound 3k**

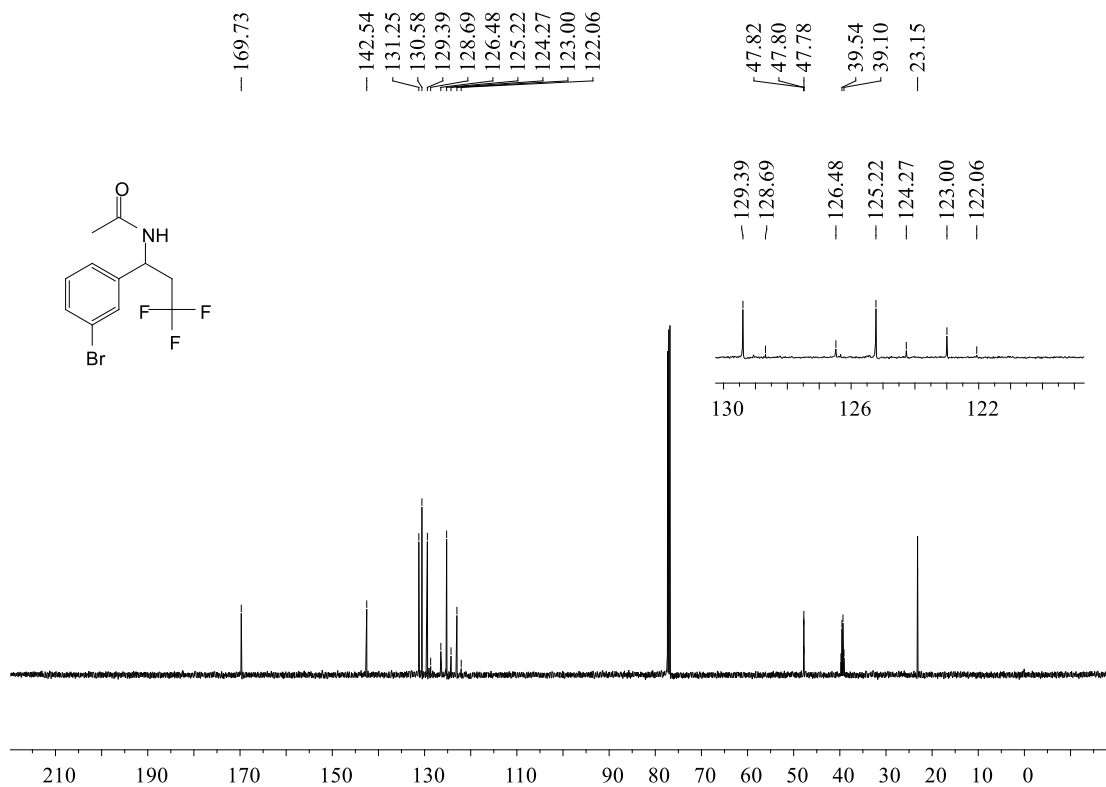

## $^{19}\text{F}$ NMR (471 MHz, $\text{CDCl}_3$ ) spectrum of compound **3k**

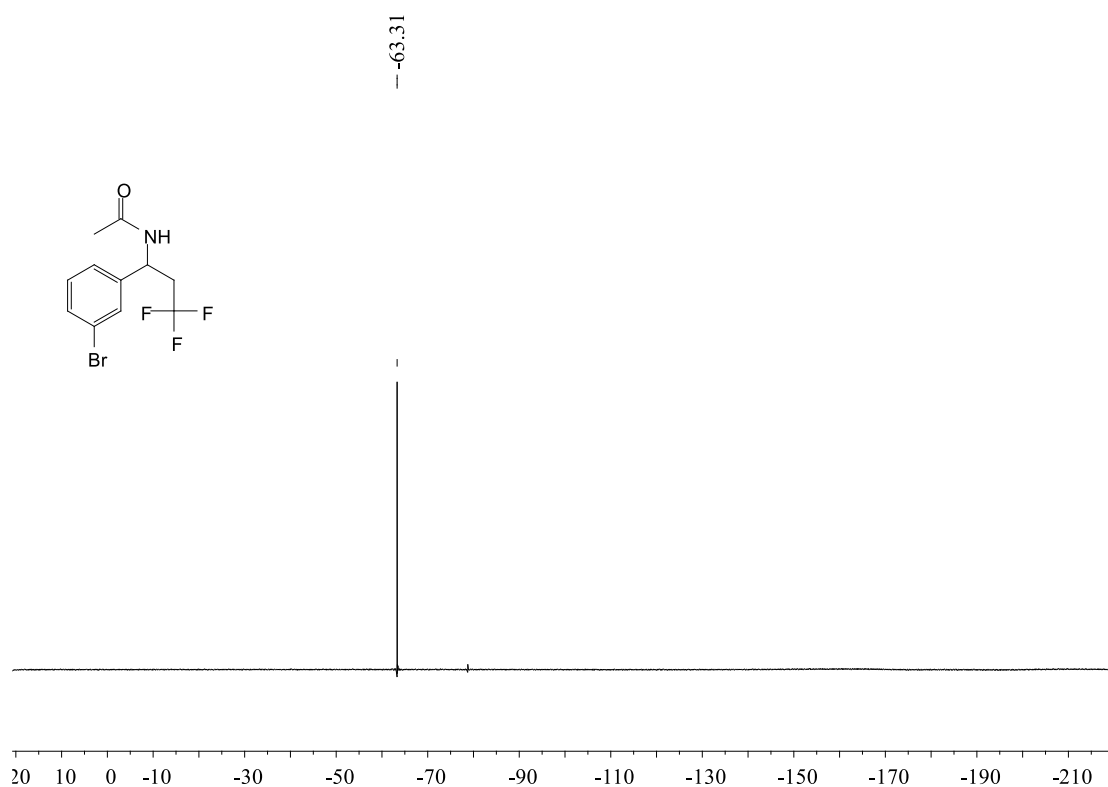

## 2. X-ray Crystallographic Data

The X-ray crystallographic structures for **3j**. ORTEP representation with 50% probability thermal ellipsoids. Solvent and hydrogen are omitted for clarity. Solvent and hydrogen are omitted for clarity. Crystal data have been deposited to CCDC, number 1905218.

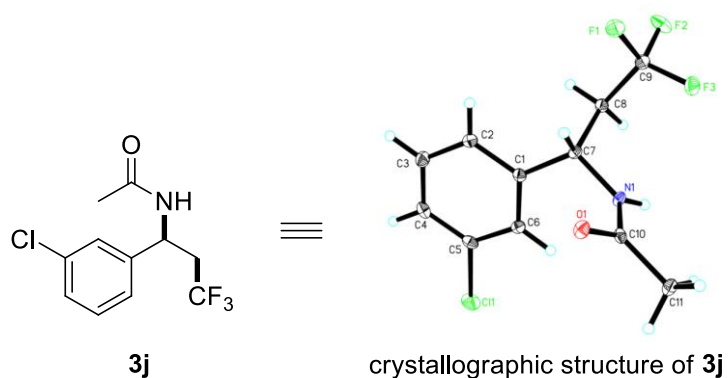

**Table 1. Crystal Data and Structure Refinement for **3j**.**

|                     |                                                   |
|---------------------|---------------------------------------------------|
| Identification code | <b>3j</b>                                         |
| Empirical formula   | $\text{C}_{11}\text{H}_{11}\text{ClF}_3\text{NO}$ |
| Formula weight      | 265.66                                            |
| Temperature/K       | 100.00(10)                                        |

|                                             |                                                               |
|---------------------------------------------|---------------------------------------------------------------|
| Crystal system                              | monoclinic                                                    |
| Space group                                 | P2 <sub>1</sub> /c                                            |
| a/Å                                         | 14.4474(19)                                                   |
| b/Å                                         | 9.1512(10)                                                    |
| c/Å                                         | 9.2001(12)                                                    |
| $\alpha$ /                                  | 90                                                            |
| $\beta$ /                                   | 103.529(13)                                                   |
| $\gamma$ /                                  | 90                                                            |
| Volume/Å <sup>3</sup>                       | 1182.6(3)                                                     |
| Z                                           | 4                                                             |
| $\rho_{\text{calc}}$ /cm <sup>3</sup>       | 1.492                                                         |
| $\mu$ /mm <sup>-1</sup>                     | 0.344                                                         |
| F(000)                                      | 544.0                                                         |
| Crystal size/mm <sup>3</sup>                | 0.14 × 0.12 × 0.09                                            |
| Radiation                                   | MoK $\alpha$ ( $\lambda$ = 0.71073)                           |
| 2 $\theta$ range for data collection/       | 5.312 to 59.022                                               |
| Index ranges                                | -13 ≤ h ≤ 18, -12 ≤ k ≤ 8, -12 ≤ l ≤ 12                       |
| Reflections collected                       | 6107                                                          |
| Independent reflections                     | 2821 [R <sub>int</sub> = 0.0300, R <sub>sigma</sub> = 0.0511] |
| Data/restraints/parameters                  | 2821/0/155                                                    |
| Goodness-of-fit on F <sup>2</sup>           | 1.071                                                         |
| Final R indexes [I ≥ 2 $\sigma$ (I)]        | R <sub>1</sub> = 0.0476, wR <sub>2</sub> = 0.0988             |
| Final R indexes [all data]                  | R <sub>1</sub> = 0.0646, wR <sub>2</sub> = 0.1088             |
| Largest diff. peak/hole / e Å <sup>-3</sup> | 0.32/-0.41                                                    |

**Table 2. Fractional Atomic Coordinates ( $\times 10^4$ ) and Equivalent Isotropic Displacement Parameters ( $\text{\AA}^2 \times 10^3$ ) for 3j.**

| Atom | x           | y          | z           | U(eq)     |
|------|-------------|------------|-------------|-----------|
| Cl1  | -63.5(4)    | 6921.0(7)  | -1448.5(7)  | 33.81(18) |
| F1   | -5199.4(9)  | 2961.9(15) | -3101.7(14) | 31.9(3)   |
| F2   | -5377.6(10) | 3716.6(15) | -973.5(16)  | 34.4(4)   |
| F3   | -4472.9(10) | 1881.7(13) | -1099.5(15) | 30.0(3)   |
| O007 | -2244.1(11) | 1452.7(15) | -3489.0(14) | 20.0(3)   |
| N1   | -2544.7(12) | 2634.1(18) | -1498.4(18) | 15.5(4)   |
| C1   | -2608.2(14) | 5026(2)    | -2778(2)    | 16.0(4)   |
| C2   | -3059.2(16) | 5953(2)    | -3935(2)    | 22.4(5)   |
| C3   | -2591.0(17) | 7164(2)    | -4312(3)    | 24.6(5)   |
| C4   | -1664.3(16) | 7474(2)    | -3548(2)    | 22.2(5)   |
| C5   | -1226.7(15) | 6554(2)    | -2413(2)    | 19.9(4)   |

|     |             |         |          |         |
|-----|-------------|---------|----------|---------|
| C6  | -1680.9(15) | 5334(2) | -2016(2) | 17.4(4) |
| C7  | -3159.5(14) | 3722(2) | -2390(2) | 15.3(4) |
| C8  | -3913.7(14) | 4238(2) | -1565(2) | 17.1(4) |
| C9  | -4727.1(15) | 3202(2) | -1670(2) | 19.7(4) |
| C10 | -2115.1(14) | 1588(2) | -2121(2) | 15.4(4) |
| C11 | -1469.0(15) | 580(2)  | -1065(2) | 19.9(5) |

**Table 3. Anisotropic Displacement Parameters ( $\text{\AA}^2 \times 10^3$ ) for 3j.**

| Atom | U <sub>11</sub> | U <sub>22</sub> | U <sub>33</sub> | U <sub>23</sub> | U <sub>13</sub> | U <sub>12</sub> |
|------|-----------------|-----------------|-----------------|-----------------|-----------------|-----------------|
| C11  | 22.7(3)         | 42.3(4)         | 34.4(3)         | -3.2(3)         | 2.5(2)          | -12.1(3)        |
| F1   | 25.0(8)         | 44.1(8)         | 22.0(7)         | 1.9(6)          | -3.7(5)         | -9.7(6)         |
| F2   | 24.7(8)         | 38.5(8)         | 45.6(8)         | -6.7(7)         | 19.5(6)         | -6.3(6)         |
| F3   | 29.9(8)         | 23.5(7)         | 34.3(8)         | 8.2(6)          | 3.0(6)          | -5.9(6)         |
| O007 | 26.0(9)         | 23.0(8)         | 11.0(7)         | -1.3(6)         | 4.2(6)          | 2.1(6)          |
| N1   | 19.7(9)         | 16.4(8)         | 9.7(8)          | 1.3(7)          | 2.2(6)          | 3.0(7)          |
| C1   | 17.7(11)        | 16.2(10)        | 15.3(10)        | -1.6(8)         | 6.6(8)          | 1.6(8)          |
| C2   | 17.5(11)        | 23.8(11)        | 25.1(11)        | 4.8(9)          | 3.6(9)          | 1.4(9)          |
| C3   | 27.0(13)        | 21.5(11)        | 26.3(12)        | 6.3(9)          | 8.4(10)         | 4.5(9)          |
| C4   | 27.6(13)        | 18.0(10)        | 24.9(11)        | -1.4(9)         | 13.9(9)         | -3.5(9)         |
| C5   | 16.3(11)        | 24.2(11)        | 20.3(10)        | -7.9(9)         | 6.5(8)          | -3.2(9)         |
| C6   | 18.1(11)        | 19.0(10)        | 14.9(10)        | -2.0(8)         | 3.8(8)          | 2.5(8)          |
| C7   | 16.2(10)        | 16.3(9)         | 12.3(9)         | -0.2(8)         | 1.2(7)          | 1.5(8)          |
| C8   | 18.3(11)        | 16.5(9)         | 17.1(10)        | 0.8(8)          | 5.0(8)          | 0.8(8)          |
| C9   | 19.0(11)        | 21.3(11)        | 18.0(10)        | 0.0(9)          | 2.9(8)          | -0.8(9)         |
| C10  | 16.3(10)        | 15.1(9)         | 15.0(10)        | 0.9(8)          | 3.8(8)          | -4.8(8)         |
| C11  | 25.3(12)        | 18.4(10)        | 16.1(10)        | 2.5(8)          | 5.0(8)          | 4.7(9)          |

**Table 4. Bond Lengths for 3j.**

| Atom | Atom | Length/ $\text{\AA}$ | Atom | Atom | Length/ $\text{\AA}$ |
|------|------|----------------------|------|------|----------------------|
| C11  | C5   | 1.740(2)             | C1   | C7   | 1.523(3)             |
| F1   | C9   | 1.352(2)             | C2   | C3   | 1.384(3)             |
| F2   | C9   | 1.341(2)             | C3   | C4   | 1.388(3)             |
| F3   | C9   | 1.334(2)             | C4   | C5   | 1.374(3)             |
| O007 | C10  | 1.235(2)             | C5   | C6   | 1.387(3)             |
| N1   | C7   | 1.453(2)             | C7   | C8   | 1.541(3)             |
| N1   | C10  | 1.340(3)             | C8   | C9   | 1.495(3)             |
| C1   | C2   | 1.397(3)             | C10  | C11  | 1.497(3)             |

|    |    |          |
|----|----|----------|
| C1 | C6 | 1.388(3) |
|----|----|----------|

**Table 5. Bond Angles for 3j.**

| Atom | Atom | Atom | Angle/°    | Atom | Atom | Atom | Angle/°    |
|------|------|------|------------|------|------|------|------------|
| C10  | N1   | C7   | 122.09(16) | N1   | C7   | C8   | 109.94(15) |
| C2   | C1   | C7   | 118.57(18) | C1   | C7   | C8   | 110.16(16) |
| C6   | C1   | C2   | 118.97(19) | C9   | C8   | C7   | 114.17(17) |
| C6   | C1   | C7   | 122.46(18) | F1   | C9   | C8   | 112.09(17) |
| C3   | C2   | C1   | 120.6(2)   | F2   | C9   | F1   | 105.80(17) |
| C2   | C3   | C4   | 120.4(2)   | F2   | C9   | C8   | 111.98(17) |
| C5   | C4   | C3   | 118.5(2)   | F3   | C9   | F1   | 105.44(17) |
| C4   | C5   | C11  | 119.15(17) | F3   | C9   | F2   | 106.81(17) |
| C4   | C5   | C6   | 122.1(2)   | F3   | C9   | C8   | 114.13(18) |
| C6   | C5   | C11  | 118.75(17) | O007 | C10  | N1   | 122.21(18) |
| C5   | C6   | C1   | 119.38(19) | O007 | C10  | C11  | 121.44(18) |
| N1   | C7   | C1   | 112.64(16) | N1   | C10  | C11  | 116.36(16) |

**Table 6. Hydrogen Atom Coordinates ( $\text{\AA}\times 10^4$ ) and Isotropic Displacement Parameters ( $\text{\AA}^2\times 10^3$ ) for 3j.**

| Atom | x        | y       | z        | U(eq) |
|------|----------|---------|----------|-------|
| H1   | -2444.93 | 2680.83 | -540.5   | 19    |
| H2   | -3692.84 | 5750.56 | -4466.82 | 27    |
| H3   | -2906.04 | 7787.86 | -5098.68 | 29    |
| H4   | -1339.68 | 8303.18 | -3803.33 | 27    |
| H6   | -1360.25 | 4714.18 | -1229.55 | 21    |
| H7   | -3498.73 | 3248.62 | -3346.02 | 18    |
| H8A  | -3601.44 | 4387.18 | -496.63  | 21    |
| H8B  | -4167.32 | 5193.56 | -1980.19 | 21    |
| H11A | -1681.26 | -431.04 | -1279.36 | 30    |
| H11B | -1485.61 | 825.38  | -35.01   | 30    |
| H11C | -817.17  | 685.18  | -1191.15 | 30    |

### 3. Other Alkenes and Nitriles Examined

#### Scheme 1. Other alkenes examined

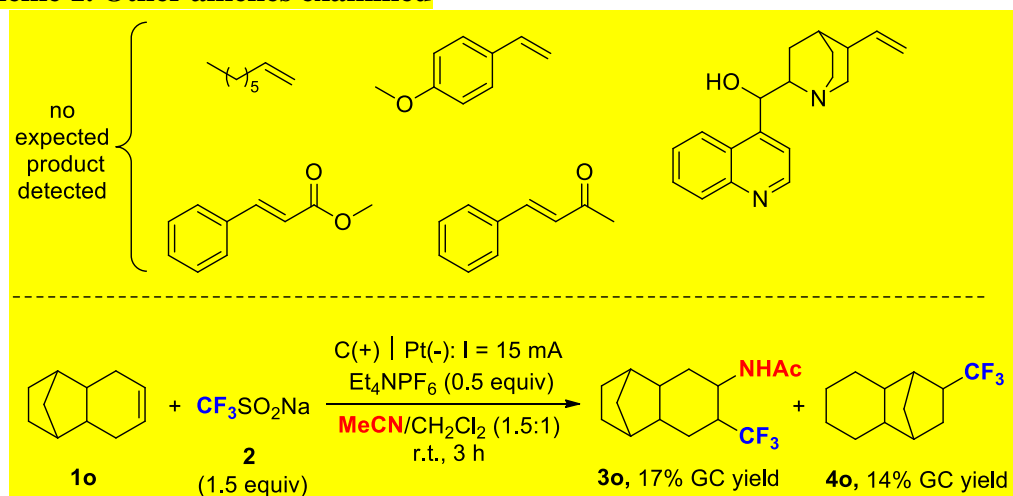

In order to expand the scope of the substrates, we examined different types of alkenes (Scheme 1). Other terminal olefins were tried and found, such as 1-octene, *p*-methoxystyrene and cinchonine, and no desired products were detected in the reaction. Among them, *p*-methoxystyrene was speculated to polymerize in reaction before electrolysis. In addition, different internal alkenes had also been examined, including methyl cinnamate, (*E*)-4-phenylbut-3-en-2-one and tricyclo[6.2.1.0(2,7)]undeca-4-ene. When methyl cinnamate and (*E*)-4-phenylbut-3-en-2-one were used as substrates, no expected product was detected in the reaction, and meanwhile, the substrates were partially decomposed. When tricyclo[6.2.1.0(2,7)]undeca-4-ene was used as a substrate, the expected product was detected with a GC yield of 17%, meanwhile, we could also detect the trifluoromethylation product **4o** with a GC yield of 14%.

#### Scheme 2. Other nitriles examined

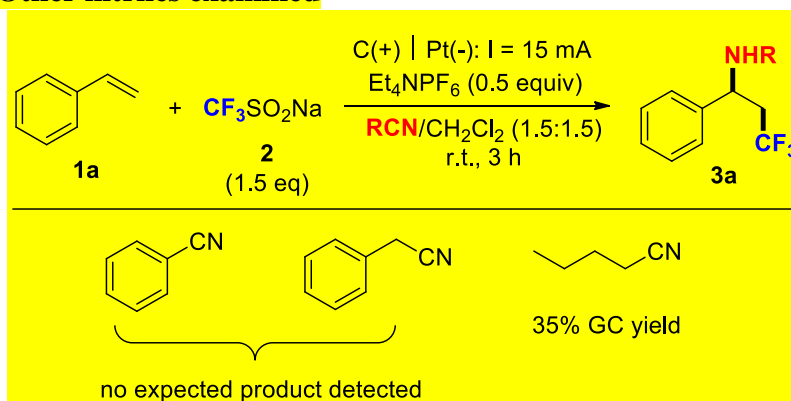

In addition, we had also tried to replace acetonitrile with different nitriles to further expand the scope of the substrates (Scheme 2). During the reaction, we found that the use of benzonitrile or phenylacetonitrile instead of acetonitrile could decrease the conductivity of the reaction system, making it difficult for the current to meet the reaction requirements, and no expected product was detected after the reaction. When valeronitrile was used as reaction substrates, we only detected the corresponding products in the reaction with yield of 35%.
